1 **Title: The relative transmissibility of shigellosis among male and female individuals in Hubei**

2 **Province, China: a modelling study.**

3 **Running title: Transmissibility of shigellosis.**

4 **Author and affiliations:**

5 **Zeyu Zhao<sup>1\*</sup>, Qi Chen<sup>2\*</sup>, Bin Zhao<sup>3\*</sup>, Mikah Ngwanguong Hannah<sup>4</sup>, Ning Wang<sup>5</sup>, Yuxin Wang<sup>6</sup>,**

6 **Xianfa Xuan<sup>6</sup>, Jia Rui<sup>1</sup>, Meijie Chu<sup>1</sup>, Yao Wang<sup>1</sup>, Xingchun Liu<sup>1</sup>, An Ran<sup>1</sup>, Lili Pan<sup>1</sup>, Yi-Chen**

7 **Chiang<sup>1</sup>, Yanhua Su<sup>1#</sup>, Benhua Zhao<sup>1#</sup>, Tianmu Chen<sup>1#</sup>**

8 1. State Key Laboratory of Molecular Vaccinology and Molecular Diagnostics, School of Public Health,  
9 Xiamen University, Xiamen City, Fujian Province, People's Republic of China;

10 2. Hubei Provincial Center for Disease Control and Prevention, Wuhan City, Hubei Province, People's  
11 Republic of China;

12 3. State Key Laboratory of Molecular Vaccinology and Molecular Diagnosis, Laboratory Department,  
13 Xiang'an Hospital of Xiamen University, Xiamen, Fujian, China;

14 4. Medical College, Xiamen University, Xiamen City, Fujian Province, People's Republic of China;

15 5. Respiration Department, Shanghai General Hospital, Shanghai, China

16 6. Department of Nephrology, Xiang'an hospital of Xiamen University, Xiamen, Fujian, China

17 **\* These authors contributed equally to this study.**

18

19 **# Corresponding author**

20 **Tianmu Chen**

21 State Key Laboratory of Molecular Vaccinology and Molecular Diagnostics, School of Public Health,

22 Xiamen University

23 4221-117 South Xiang'an Road, Xiang'an District, Xiamen, Fujian Province, People's Republic of China

24 Tel: +86-13661934715

25 Email: 13698665@qq.com

26 **Yanhua Su**

27 State Key Laboratory of Molecular Vaccinology and Molecular Diagnostics, School of Public Health,

28 Xiamen University

29 4221-117 South Xiang'an Road, Xiang'an District, Xiamen, Fujian Province, People's Republic of China

30 Tel: +86-18965144848

31 Email: [suyanhua813@xmu.edu.cn](mailto:suyanhua813@xmu.edu.cn)

32 **Benhua Zhao**

33 State Key Laboratory of Molecular Vaccinology and Molecular Diagnostics, School of Public Health,

34 Xiamen University

35 4221-117 South Xiang'an Road, Xiang'an District, Xiamen, Fujian Province, People's Republic of China

36 Tel: +86-15359221955

37 Email: [benhuazhao@163.com](mailto:benhuazhao@163.com)

38

39

40 **Abstract**

41 **Objective:** Shigellosis has been a heavy burden in China. However, its relative transmissibility in male  
42 and female individuals remains unclear.

43 **Method:** A sex-based Susceptible–Exposed–Infectious/Asymptomatic–Recovered (SEIAR) model was  
44 applied to explore the dataset of reported shigellosis cases built by Hubei Province from 2005 to 2017. Two  
45 indicators, secondary attack rate (SAR) and relative ratio of SAR between males and females, were  
46 developed to assess the relative transmissibility in males and females.

47 **Results:** The number of cases and reported incidences in males and females demonstrated a significant  
48 decreasing trend (Male trend:  $\chi^2 = 11.268$ ,  $P = 0.001$ , Female trend:  $\chi^2 = 11.144$ ,  $P = 0.001$ ). SEIAR model  
49 had a great fitting effect with the data of shigellosis ( $P < 0.001$ ). Our simulation revealed that, when  
50 parameter  $\beta_{fm} = 0$ , the greatest decrease in cases were obtained for different genders. The median value for  
51  $SAR_{mm}$  was  $2.3225 \times 10^{-8}$  (Range:  $1.7574 \times 10^{-8} - 3.8565 \times 10^{-8}$ ),  $SAR_{mf}$  was  $2.5729 \times 10^{-8}$  (Range:  $1.3772$   
52  $\times 10^{-8} - 3.2773 \times 10^{-8}$ ),  $SAR_{fm}$  was  $2.7630 \times 10^{-8}$  (Range:  $1.8387 \times 10^{-8} - 4.2638 \times 10^{-8}$ ) and  $SAR_{ff}$  was  
53  $2.1061 \times 10^{-8}$  (Range:  $1.0201 \times 10^{-8} - 3.2140 \times 10^{-8}$ ). The median value of relative ratio calculated by SAR  
54 in *mm* versus (vs) *mf* was 0.93 (Range: 0.75 – 1.47), *mm* vs *fm* was 0.90 (Range: 0.41 – 1.81), *mm* vs *ff* was  
55 1.07 (Range: 0.55 – 2.93), *mf* vs *fm* was 0.99 (Range: 0.32 – 1.25), *mf* vs *ff* was 1.17 (Range: 0.43 – 3.21)  
56 and *ff* vs *fm* was 0.75 (Range: 0.35 – 1.06).

57 **Conclusion:** Transmissibility of shigellosis is different among male and female individuals. Shigellosis  
58 seems to be more transmissible in males than in females.

59 **Key words:** Transmissibility; Shigellosis; Mathematical model

60

61 **Author summary**

62 Shigellosis, also known as bacillary dysentery, is an infectious disease caused by the genus *Shigella spp.*  
63 Developing countries have high disease burden of shigellosis. However, its relative transmissibility in  
64 male and female individuals remains unclear. In this study, we employed a mathematical model to  
65 explore the dataset of reported shigellosis cases built by Hubei Province, China from 2005 to 2017. Two  
66 indicators, secondary attack rate (SAR) and relative ratio of SAR between males and females, were  
67 developed to assess the relative transmissibility in males and females. We found that shigellosis has

68 medium transmissibility among male and female individuals. The disease seems to be more  
69 transmissible in males than in females.

70

71

72

73

74

## 75 **Introduction**

76 Shigellosis, also known as bacillary dysentery, is an infectious disease caused by the genus *Shigella*  
77 *spp*, and often occurs in summer and autumn. *Shigella flexneri* is the main cause of endemic diarrhoea in  
78 low and middle income countries, and lays a heavy burden on these countries, especially in children aged  
79 1-4 years old [1]. According to the Chinese Center for Disease Control and Prevention, about  
80 150,000~450,000 cases were reported annually within the period 2005 to 2014 [2]. Although there has been  
81 an improvement in the quality of water and sanitation, shigellosis remains a major public health problem in  
82 some developing countries, including China [3, 4].

83 Bacillary dysentery is an intestinal infectious disease, which can be transmitted via the consumption of  
84 contaminated food or water [5]. Humans are the only natural host for *shigella*. Shigellosis has low  
85 infectious dose and transmission primarily occurs from person-to-person [1]. Previously, a study was done  
86 [6] in China during which it was evaluated that, contaminated water and food hardly contributed to  
87 shigellosis. According to these reports, the incidence rate of bacillary dysentery is higher in males than in  
88 females [7]. So, was there a shift route in the transmission of shigellosis in developing countries? What is  
89 the process of transmission among individuals? What caused the different incidence in males and females?

90 The distribution of time and space were focused more in the model studies of shigellosis, while  
91 population-based research was less [8-12]. Studies have showed that the Susceptible–Exposed–  
92 Infectious/Asymptomatic–Recovered–Water (SEIARW) model has a great fitting effect [6]. However, it  
93 does not estimate the transmissibility of bacillary dysentery between males and females. Therefore, a new  
94 model–SEIAR, is formed by simplifying the SEIARW model. We adopted secondary attack rate (*SAR*) to  
95 quantify the infectivity of shigellosis and relative ratio to assess the transmissibility of shigellosis between  
96 males and females.

97 In this study, we collected Shigellosis cases reported in Hubei Province, China, adopted SEIAR model  
98 to fit the data, calculated related index and figured out the transmissibility of shigellosis between males and  
99 females.

100

## 101 **Materials and Methods**

### 102 **Data sources**

103 A dataset of shigellosis reported cases built by Hubei Province from January 2005 to December 2017,  
104 were collected from China Information System for Disease Control and Prevention. We cleared up the date  
105 and sex (male or female) of onset of illness for each case. The informations of the population such as, birth  
106 rate, death rate and total population were obtained from Hubei Statistical Yearbook.

### 107 **Shigellosis model between different genders**

108 According to a new review [1], the transmission of shigellosis is mainly from person-to-person in  
109 developed countries. Therefore, the SEIAR model was developed according to the natural history of  
110 shigellosis between male and female individuals (Figure 1). The pattern followed by the model was from  
111 person-to-person, which contained susceptible (S), exposed (E), symptomatic (I), asymptomatic (A), and  
112 recovered (R) individuals (Table 1). We used the subscript  $m$  to represent male and  $f$  to represent female. In  
113 the model, we assumed that:

114 a) Relative rate of transmission among male and female individuals was  $\beta_m$  and  $\beta_f$ , respectively;

115 b) Relative rate of transmission from male to female was  $\beta_{mf}$  and from female to male was  $\beta_{fm}$ .

116 We assumed that in both males and females:

117 a) The disease does not spread vertically, and the individuals born in various groups are all susceptible.

118 The natural birth rate is  $br$ , and the natural mortality rate is  $dr$ ;

119 b) The proportion of latency patients  $(1-p)E$  ( $0 \leq p \leq 1$ ) will change to infected person  $I$  after one

120 incubation period, while another part of the latent  $pE$  will become a latent infected person  $A$  after an

121 incubation period. Therefore, at time  $t$ , the speed from  $E$  to  $I$  is proportional to the latency group, the

122 proportional coefficient is  $(1-p)\omega$ , and the speed from  $E$  to  $A$  is proportional to the latency population, and

123 the proportional coefficient is  $p\omega$ ;

124 c) The speeds removed from  $I$  and  $A$  are proportional to the number of people in both groups, and the

125 proportional coefficients are  $\gamma$  and  $\gamma'$ , respectively.

126 The model was expressed as follows:

$$127 \quad \frac{dS_m}{dt} = brNq - \beta_m S_m (I_m + kA_m) - \beta_{fm} S_m (I_f + kA_f) - drS_m$$

$$128 \quad \frac{dE_m}{dt} = \beta_m S_m (I_m + kA_m) + \beta_{fm} S_m (I_f + kA_f) - \omega E_m - drE_m$$

$$129 \quad \frac{dI_m}{dt} = (1 - p)\omega E_m - \gamma I_m - (drI_m + fI_m)$$

$$130 \quad \frac{dA_m}{dt} = p\omega E_m - \gamma' A_m - drA_m$$

$$131 \quad \frac{dR_m}{dt} = \gamma I_m + \gamma' A_m - drR_m$$

$$132 \quad \frac{dS_f}{dt} = brNq - \beta_f S_f (I_f + kA_f) - \beta_{mf} S_f (I_m + kA_m) - drS_f$$

$$133 \quad \frac{dE_f}{dt} = \beta_f S_f (I_f + kA_f) + \beta_{mf} S_f (I_m + kA_m) - \omega E_f - drE_f$$

$$134 \quad \frac{dI_f}{dt} = (1 - p)\omega E_f - \gamma I_f - (drI_f + fI_f)$$

$$135 \quad \frac{dA_f}{dt} = p\omega E_f - \gamma' A_f - drA_f$$

$$136 \quad \frac{dR_f}{dt} = \gamma I_f + \gamma' A_f - drR_f$$

$$137 \quad N = S_m + E_m + I_m + A_m + R_m + S_f + E_f + I_f + A_f + R_f$$

138 The left side of the equation shows the instantaneous rate of change of  $S$ ,  $E$ ,  $I$ ,  $A$  and  $R$  at time  $t$ . In the  
139 equations, the parameters  $\beta_m$ ,  $\beta_f$ ,  $\beta_{mf}$ ,  $\beta_{fm}$ ,  $k$ ,  $\omega$ ,  $p$ ,  $f$ ,  $\gamma$  and  $\gamma'$  refer to relative rate of transmission in males,  
140 relative rate of transmission in females, relative rate of transmission from male to female, relative rate of  
141 transmission from female to male, relative transmissibility of asymptomatic to symptomatic individuals,  
142 incubation period, proportion of asymptomatic individuals, fatality of shigellosis, recovery rate of  
143 symptomatic individuals, recovery rate of asymptomatic individuals.

144 In the model, we quantify the transmissibility of shigellosis by secondary attack rate ( $SAR$ ), which is  
145 defined as the probability that infection occurs among susceptible persons within a reasonable incubation  
146 period, following contact with an infectious person or an infectious source. Relative ratio of transmission

147 is developed to assess the relative transmissibility of male versus female. We calculated the *SAR* and  
148 relative ratio by the equation as follows:

149  $SAR_{mm} = \beta_{mm}S_m \times 1/(\gamma * N_m)$

150  $SAR_{mf} = \beta_{mf}S_f \times 1/(\gamma * N_f)$

151  $SAR_{fm} = \beta_{fm}S_m \times 1/(\gamma * N_m)$

152  $SAR_{ff} = \beta_{ff}S_f \times 1/(\gamma * N_f)$

153  $mm \text{ vs } mf = SAR_{mm}/SAR_{mf}$

154  $mm \text{ vs } fm = SAR_{mm}/SAR_{fm}$

155  $mm \text{ vs } ff = SAR_{mm}/SAR_{ff}$

156  $mf \text{ vs } fm = SAR_{mf}/SAR_{fm}$

157  $mf \text{ vs } ff = SAR_{mf}/SAR_{ff}$

158  $ff \text{ vs } fm = SAR_{ff}/SAR_{fm}$

159 In the equation, we defined the subscripts; *mm*, *ff*, *mf* and *fm* as among males, among females, from  
160 female to male, and from male to female, respectively. *mm vs mf*, *mm vs fm*, *mm vs ff*, *mf vs fm*, *mf vs ff*  
161 and *ff vs fm* refer to *mm*, *ff*, *mf* and *fm*, which have similar definitions as with the subscript of *SAR*.

## 162 **Estimation of Parameters**

163 According to epidemiological characteristics of shigellosis and previous study [6], we set *k*, *ω*, *γ* and *γ'*  
164 as 0.3125, 1.0000, 0.0741 and 0.0286, respectively. The proportions of asymptomatic individuals were  
165 reported to range from 0.0037 to 0.2700 [13-15]. We set *p* = 0.1 in SEIAR model. The fatality rate of the  
166 disease reported in a study decreased from 0.00031 to 0.00088 from 1991 to 2000 [16]. Considering  
167 the fatality rate of shigellosis is extremely low, we set *f* = 0. The values of  $\beta_m$ ,  $\beta_f$ ,  $\beta_{mf}$  and  $\beta_{fm}$  were  
168 generated by curve fitting using SEIAR model and reported shigellosis data. In order to simulate the  
169 contribution of  $\beta_m$ ,  $\beta_f$ ,  $\beta_{mf}$  and  $\beta_{fm}$  during the transmission, we performed a “knock-out” simulation in five  
170 scenarios: A)  $\beta_m = 0$ ; B)  $\beta_{mf} = 0$ ; C)  $\beta_f = 0$ ; D)  $\beta_{fm} = 0$ ; E) control (no intervention).

## 171 **Simulation method and statistical analysis**

172 Berkeley Madonna 8.3.18 (developed by Robert Macey and George Oster of the University of  
173 California at Berkeley. Copyright ©1993-2001 Robert I. Macey & George F. Oster) was employed for  
174 model simulation. Simulation methods were as previously described [6, 17-20]. Microsoft Office Excel

175 2007 (Microsoft, Redmond, WA, USA) and GraphPad Prism 7.00 (GraphPad Software, La Jolla California,  
176 USA) were employed for figure development and data analysis. SPSS 21.0 (IBM Corp, Armonk, NY, USA)  
177 was used to calculate coefficient of determination ( $R^2$ ) by curve fitting, which was adopted to judge the  
178 goodness of fit of the model.

## 179 **Ethics**

180 This effort of disease control was part of CDC's routine responsibility in Hubei Province; therefore,  
181 institutional review and informed consent were not required for this study.

182

## 183 **Results**

### 184 **Epidemiological characteristics of shigellosis reported cases**

185 From 2005 to 2017, 130770 shigellosis cases (including 73981 male cases and 56789 female cases)  
186 were reported in Hubei province (Figure 2). The median of incidences reported annually was 21.68 per  
187 100000 persons (range: 6.10 – 32.63 per 100000 persons) in males and 17.91 per 100000 persons (range:  
188 5.87 – 26.51 per 100000 persons) in females. It demonstrated that, the number of cases and reported  
189 incidences in males and females had significantly decreased. (Male trend:  $\chi^2 = 11.268$ ,  $P = 0.001$ , Female  
190 trend:  $\chi^2 = 11.144$ ,  $P = 0.001$ ).

### 191 **Curve fitting results**

192 The results of curve fitting showed that the SEIAR model fitted the data well (Figure 3). The  $R^2$  of  
193 SEIAR model of different genders each year were shown in Table 1. The model had a great fitting effect  
194 with the data of shigellosis (Supplementary Table 1).

### 195 **The transmissibility of shigellosis**

196 From Figure 4, the results of the “knock-out” simulation showed that the number of cases in different  
197 genders using parameters  $\beta_m = 0$ ,  $\beta_f = 0$ ,  $\beta_{mf} = 0$  and  $\beta_{fm} = 0$  were lower than in the control group. When  $\beta_{fm}$   
198 = 0, the number of cases decreased most in different genders.

199 Figure 5 showed the difference between the mean and 95% confidence interval (CI) from 2005 to  
200 2017 using  $\beta_m$ ,  $\beta_f$ ,  $\beta_{mf}$  and  $\beta_{fm}$ . The mean value when using  $\beta_m$  was  $1.9240 \times 10^{-9}$  (95% CI:  $1.6621 \times 10^{-9}$  –  
201  $6.6121 \times 10^{-9}$ ), using  $\beta_f$  was  $1.5645 \times 10^{-9}$  (95% CI:  $1.3521 \times 10^{-9}$  –  $1.7769 \times 10^{-9}$ ), using  $\beta_{fm}$  was  $2.1572 \times$   
202  $10^{-9}$  (95% CI:  $1.9159 \times 10^{-9}$  –  $2.3986 \times 10^{-9}$ ) and using  $\beta_{mf}$  was  $1.8750 \times 10^{-9}$  (95% CI:  $1.6846 \times 10^{-9}$  –  
203  $2.0654 \times 10^{-9}$ ).



204 The results of *SAR* from 2005 to 2017 were showed in Figure 6 and Figure 7. The median value of  
205  $SAR_{mm}$  was  $2.3225 \times 10^{-8}$  (Range:  $1.7574 \times 10^{-8} - 3.8565 \times 10^{-8}$ ). The median value of  $SAR_{mf}$  was  $2.5729 \times$   
206  $10^{-8}$  (Range:  $1.3772 \times 10^{-8} - 3.2773 \times 10^{-8}$ ). The median value of  $SAR_{fm}$  was  $2.7630 \times 10^{-8}$  (Range:  $1.8387$   
207  $\times 10^{-8} - 4.2638 \times 10^{-8}$ ). The median value of  $SAR_{ff}$  was  $2.1061 \times 10^{-8}$  (Range:  $1.0201 \times 10^{-8} - 3.2140 \times 10^{-}$   
208  $8$ ).

209 The results of relative ratio of the dataset were depicted in Figure 8. The median value of relative ratio  
210 calculated by *SAR* in *mm* vs *mf* was 0.93 (Range: 0.75 – 1.47). The median value of relative ratio in *mm* vs  
211 *fm* was 0.90 (Range: 0.41 – 1.81), *mm* vs *ff* was 1.07 (Range: 0.55 – 2.93), *mf* vs *fm* was 0.99 (Range: 0.32  
212 – 1.25), *mf* vs *ff* was 1.17 (Range: 0.43 – 3.21) and *ff* vs *fm* was 0.75 (Range: 0.35 – 1.06) (Figure 9).

213

## 214 Discussion

215 In this study, we were the first ones to make the transmission of shigellosis between different genders  
216 clear. We applied SEIAR model to explore the differences of the water-borne infectious disease in males  
217 and females for the first time. It has guiding significance for controlling the prevalence of shigellosis.

## 218 Validity of the model

219 According to  $R^2$  of linear regression, the model of SEIAR has a high good-of-fitness with the reported  
220 data in different genders. It is consistent with the results of a research [6], suggesting the model is suitable  
221 for this study.

## 222 Epidemiological characteristics

223 In recent years, although the incidence of shigellosis has a decreasing trend in China [16, 21, 22], it is  
224 still relatively high level in Hubei province from 2005 to 2017. The difference incidence of shigellosis  
225 cases in male and female is observed by the descriptive epidemiology [23, 24]. However, all of them do not  
226 clarify the reasons for the difference. A study indicates that there were more male than female cases (the  
227 ratio of male to female is 1.3:1), which is consistent with our results in descriptive epidemiology [25].

228 According to a new review[1], the transmission pattern of shigellosis has shifted from water/food-to-  
229 person to from person-to-person, with high risk groups being particularly men who have sex with other  
230 men in developed country. Does this mean that the transmissibility of shigellosis among males is stronger  
231 than among females? We developed SEIAR model to verify this hypothesis. However, we obtained the  
232 number of cases in five hypotheses using “knock-out” simulation. When  $\beta_{fm} = 0$ , the number of cases

233 dropped most in different genders, which means that the female-to-male had a large contribution during the  
234 transmission. It is important to isolate and treat female cases, and to strengthen the personal health.

### 235 **Transmissibility of Shigellosis in different genders**

236 Compared with HIV which has different transmissibility in different genders, shigellosis is not  
237 particularly highly contagious in different genders [26]. Our results showed that the mean values of the  
238 transmission parameters among males and females, from male to female, and from female to male are  
239 different, and they have the following order:  $\beta_{fm} > \beta_m > \beta_{mf} > \beta_f$ . The median values of *SAR* have the  
240 following order:  $SAR_{fm} > SAR_{mf} > SAR_{mm} > SAR_{ff}$ . The median values of relative ratio of *SAR* have the  
241 following order:  $mf \text{ vs } ff > mm \text{ vs } ff > mf \text{ vs } fm > mm \text{ vs } mf > mm \text{ vs } fm > ff \text{ vs } mf$ . All the results have a  
242 common feature, that the transmission is mainly female-to-male. These findings showed that male  
243 individuals are more transmissible than female individuals. Therefore, the different transmissibility  
244 between males and females is the reason for the difference in distribution between genders.

245 There are a large number of studies focused on the distribution of incidence in different age groups [1,  
246 7, 16, 22]. And the high-risk group is under 5 years old and over 60 years old. Combining with our results  
247 and the actual situation of China, whether it can be considered related to the tradition of the elderly  
248 bringing children at home. Elderly people, especially grandmothers, have more daily contact with their  
249 children, which lead to such high transmission rates. Meanwhile, the transmissibility of shigellosis in  
250 different age groups further needs to be studied.

### 251 **Limitation**

252 According to a recent study, although it is mainly transmitted from person to person [1], the  
253 shigellosis is still a water/food-borne disease. For this reason, there has been an impact on our result given  
254 that we simplified the SIEARW model and ignored environmental factors (water and food). At the same  
255 time, the parameters of SIEAR model come from relevant references and Hubei Statistical Yearbook, not  
256 from collection, this has an impact on the accuracy of our model.

### 257 **Conclusions**

258 In Hubei Province, The incidence of shigellosis in males is higher than that in female, causing the  
259 disease to be a burden. The transmissibility of shigellosis is different in male and female individuals. Males  
260 seem to be more transmissible than females and the transmission is mainly female-to-male.

261

262 **Data Availability Statement:**

263 All relevant data are within the paper and its Supporting Information files.

264 **Acknowledgments**

265 We thank the staff members in the hospitals, local health departments, and local CDCs for their  
266 valuable assistance in coordinating data collection.

267

268

269

270 **Reference**

- 271 1. Kotloff KL, Riddle MS, Platts-Mills JA, Pavlinac P, Zaidi AKM. Shigellosis. *Lancet*.  
272 2018;391(10122):801-12. doi: 10.1016/S0140-6736(17)33296-8. PubMed PMID: 29254859.
- 273 2. Zhang H, Si Y, Wang X, Gong P. Environmental Drivers and Predicted Risk of Bacillary  
274 Dysentery in Southwest China. *International journal of environmental research and public*  
275 *health*. 2017;14(7). doi: 10.3390/ijerph14070782. PubMed PMID: 28708077; PubMed Central  
276 PMCID: PMC5551220.
- 277 3. Kosek M, Bern C, Guerrant RL. The global burden of diarrhoeal disease, as estimated  
278 from studies published between 1992 and 2000. *B World Health Organ*. 2003;81(3):197-204.  
279 PubMed PMID: WOS:000181649600009.
- 280 4. Carlton EJ, Liang S, McDowell JZ, Li HZ, Luo W, Remais JV. Regional disparities in the  
281 burden of disease attributable to unsafe water and poor sanitation in China. *B World Health*  
282 *Organ*. 2012;90(8):578-87. doi: 10.2471/Bl11.098343. PubMed PMID:  
283 WOS:000307485500008.
- 284 5. Kimura AC, Johnson K, Palumbo MS, Hopkins J, Boase JC, Reporter R, et al.  
285 Multistate shigellosis outbreak and commercially prepared food, United States. *Emerg Infect*  
286 *Dis*. 2004;10(6):1147-9. doi: DOI 10.3201/eid1006.030599. PubMed PMID:  
287 WOS:000221749300029.
- 288 6. Chen TM, Leung RKK, Zhou Z, Liu RC, Zhang XX, Zhang LJ. Investigation of Key  
289 Interventions for Shigellosis Outbreak Control in China. *Plos One*. 2014;9(4). doi: ARTN  
290 e95006  
291 10.1371/journal.pone.0095006. PubMed PMID: WOS:000336922600122.
- 292 7. Chang ZR, Zhang J, Ran L, Sun JL, Liu FF, Luo L, et al. The changing epidemiology of  
293 bacillary dysentery and characteristics of antimicrobial resistance of *Shigella* isolated in China  
294 from 2004-2014. *Bmc Infect Dis*. 2016;16. doi: Artn 685  
295 10.1186/S12879-016-1977-1. PubMed PMID: WOS:000389077600001.
- 296 8. Yan L, Wang H, Zhang X, Li MY, He J. Impact of meteorological factors on the  
297 incidence of bacillary dysentery in Beijing, China: A time series analysis (1970-2012). *Plos*  
298 *One*. 2017;12(8):e0182937. doi: 10.1371/journal.pone.0182937. PubMed PMID: 28796834;  
299 PubMed Central PMCID: PMC5552134.

- 300 9. Gao L, Zhang Y, Ding GY, Liu QY, Zhou MG, Li XJ, et al. Meteorological Variables and  
301 Bacillary Dysentery Cases in Changsha City, China. *Am J Trop Med Hyg.* 2014;90(4):697-704.  
302 doi: 10.4269/ajtmh.13-0198. PubMed PMID: WOS:000334091800020.
- 303 10. Zhang H, Si YL, Wang XF, Gong P. Patterns of Bacillary Dysentery in China, 2005-  
304 2010. *International journal of environmental research and public health.* 2016;13(2). doi:  
305 Artn 164
- 306 10.3390/Ijerph13020164. PubMed PMID: WOS:000371900500011.
- 307 11. Nie CJ, Li HR, Yang LS, Zhong GM, Zhang L. Socio-Economic Factors of Bacillary  
308 Dysentery Based on Spatial Correlation Analysis in Guangxi Province, China. *Plos One.*  
309 2014;9(7). doi: ARTN e102020
- 310 10.1371/journal.pone.0102020. PubMed PMID: WOS:000339615200033.
- 311 12. Xu CD, Xiao GX, Wang JF, Zhang XX, Liang JJ. Spatiotemporal Risk of Bacillary  
312 Dysentery and Sensitivity to Meteorological Factors in Hunan Province, China. *International*  
313 *journal of environmental research and public health.* 2018;15(1). doi: Artn 47
- 314 10.3390/Ijerph15010047. PubMed PMID: WOS:000424121200047.
- 315 13. Bovee L, Whelan J, Sonder GJB, van Dam AP, van den Hoek A. Risk factors for  
316 secondary transmission of Shigella infection within households: implications for current  
317 prevention policy. *Bmc Infect Dis.* 2012;12. doi: Artn 347
- 318 10.1186/1471-2334-12-347. PubMed PMID: WOS:000314232500001.
- 319 14. Khan AI, Talukder KA, Huq S, Mondal D, Malek MA, Dutta DK, et al. Detection of  
320 intra-familial transmission of shigella infection using conventional serotyping and pulsed-field  
321 gel electrophoresis. *Epidemiol Infect.* 2006;134(3):605-11. doi:  
322 10.1017/S0950268805005534. PubMed PMID: WOS:000237786200023.
- 323 15. Qadri MH, Ai-Gamdi MA, Al-Harfi RA. Asymptomatic salmonella, Shigella and intestinal  
324 parasites among primary school children in the eastern province. *Journal of family &*  
325 *community medicine.* 1995;2(2):36-40. Epub 1995/07/01. PubMed PMID: 23012224;  
326 PubMed Central PMCID: PMCPCmc3437126.
- 327 16. Wang XY, Tao F, Xiao D, Lee H, Deen J, Gong J, et al. Trend and disease burden of  
328 bacillary dysentery in China (1991-2000). *Bulletin of the World Health Organization.*  
329 2006;84(7):561-8. Epub 2006/08/01. PubMed PMID: 16878230; PubMed Central PMCID:  
330 PMCPmc2627389.
- 331 17. Liu R, Leung RK, Chen T, Zhang X, Chen F, Chen S, et al. The Effectiveness of Age-  
332 Specific Isolation Policies on Epidemics of Influenza A (H1N1) in a Large City in Central South  
333 China. *Plos One.* 2015;10(7):e0132588. doi: 10.1371/journal.pone.0132588. PubMed PMID:  
334 26161740; PubMed Central PMCID: PMC4498797.
- 335 18. Chen T, Gu H, Leung RK, Liu R, Chen Q, Wu Y, et al. Evidence-Based interventions of  
336 Norovirus outbreaks in China. *BMC public health.* 2016;16(1):1072. doi: 10.1186/s12889-  
337 016-3716-3. PubMed PMID: 27729034.
- 338 19. Chen T, Ka-Kit Leung R, Liu R, Chen F, Zhang X, Zhao J, et al. Risk of imported Ebola  
339 virus disease in China. *Travel medicine and infectious disease.* 2014;12(6 Pt A):650-8. doi:  
340 10.1016/j.tmaid.2014.10.015. PubMed PMID: 25467086.
- 341 20. Chen T, Zhao B, Liu R, Zhang X, Xie Z, Chen S. Simulation of key interventions for  
342 seasonal influenza outbreak control at school in Changsha, China. *The Journal of*  
343 *international medical research.* 2018:300060518764268. doi: 10.1177/0300060518764268.  
344 PubMed PMID: 29569977.
- 345 21. Zhao L, Xiong Y, Meng D, Guo J, Li Y, Liang L, et al. An 11-year study of shigellosis  
346 and Shigella species in Taiyuan, China: Active surveillance, epidemic characteristics, and  
347 molecular serotyping. *Journal of infection and public health.* 2017;10(6):794-8. Epub  
348 2017/02/12. doi: 10.1016/j.jiph.2017.01.009. PubMed PMID: 28188118.

- 349 22. Yan C, Chen Y, Miao Z, Qin S, Gu H, Cai J. Spatiotemporal Characteristics of Bacillary  
350 Dysentery from 2005 to 2017 in Zhejiang Province, China. *International journal of*  
351 *environmental research and public health*. 2018;15(9). Epub 2018/08/29. doi:  
352 10.3390/ijerph15091826. PubMed PMID: 30149494; PubMed Central PMCID:  
353 PMCPmc6163953.
- 354 23. Song YJ, Cheong HK, Ki M, Shin JY, Hwang SS, Park M, et al. The Epidemiological  
355 Influence of Climatic Factors on Shigellosis Incidence Rates in Korea. *International journal of*  
356 *environmental research and public health*. 2018;15(10). doi: 10.3390/ijerph15102209.  
357 PubMed PMID: 30309010; PubMed Central PMCID: PMC6210993.
- 358 24. Xu C, Li Y, Wang J, Xiao G. Spatial-temporal detection of risk factors for bacillary  
359 dysentery in Beijing, Tianjin and Hebei, China. *BMC public health*. 2017;17(1):743. doi:  
360 10.1186/s12889-017-4762-1. PubMed PMID: 28946856; PubMed Central PMCID:  
361 PMC5613329.
- 362 25. Li Z, Wang L, Sun W, Hou X, Yang H, Sun L, et al. Identifying high-risk areas of  
363 bacillary dysentery and associated meteorological factors in Wuhan, China. *Scientific reports*.  
364 2013;3:3239. doi: 10.1038/srep03239. PubMed PMID: 24257434; PubMed Central PMCID:  
365 PMC3836034.
- 366 26. Cassels S, Clark SJ, Morris M. Mathematical models for HIV transmission dynamics:  
367 tools for social and behavioral science research. *Journal of acquired immune deficiency*  
368 *syndromes*. 2008;47 Suppl 1:S34-9. doi: 10.1097/QAI.0b013e3181605da3. PubMed PMID:  
369 18301132; PubMed Central PMCID: PMC3387534.

370

371

372

373

#### 374 **Supplementary Information Legends**

375 **S1 Table. Goodness of fit of curve fitting in different sub-seasons in each year from 2005 to 2017 in**

376 **Hubei Province, China**

377

#### 378 **Figure legends**

379 **Figure 1. Flowchart of transmission SEIAR model of shigellosis in different genders.**

380 **Figure 2. Reported cases and incidence of Shigellosis in different genders from 2005 to 2017 in Hubei**  
381 **province (A: Male; B: Female).**

382 **Figure 3. Curve fitting of Model to reported data in different genders from 2005 to 2017 in Hubei (A:**  
383 **Male; B: Female).**

384 **Figure 4. The results to simulate the contribution of  $\beta$  during the transmission in different genders (A:**  
385 **Male; B: Female;  $\beta_m = 0$ , control transmission among male;  $\beta_{fm} = 0$ , control transmission among**

386 female;  $\beta_f = 0$ , control transmission from female to male;  $\beta_{mf} = 0$ , control transmission from male to  
387 female; and control defined as “None”).

388 Figure 5. The parameter of  $\beta_m$ ,  $\beta_f$ ,  $\beta_{mf}$  and  $\beta_{fm}$  during the transmission from 2005 to 2017 in Hubei (A:  
389  $\beta_m$ , transmission relative rate among male; B:  $\beta_f$ , transmission relative rate among female; C:  $\beta_{mf}$ ,  
390 transmission relative rate from male to female; D:  $\beta_{fm}$ , transmission relative rate from male to  
391 female).

392 Figure 6. The  $SAR_{mm}$ ,  $SAR_{mf}$ ,  $SAR_{fm}$  and  $SAR_{ff}$  estimated by Model from 2005 to 2017 in Hubei (A:  
393  $mm$ , among male; B:  $mf$ , from male to female; C:  $fm$ , from female to male; D:  $ff$ , among female).

394 Figure 7. Box-plot of SAR from 2005 to 2017 in Hubei ( $mm$ : among male;  $ff$ : among female;  $fm$ : from  
395 female to male;  $mf$ : from male to female).

396 Figure 8. The five kinds of relative ratio from 2005 to 2017 in Hubei (A:  $mm$  vs  $mf$ , among male  
397 versus from male to female; B:  $mm$  vs  $fm$ , among male versus from female to male; C:  $mm$  vs  $ff$ ,  
398 among male versus among female; D:  $mf$  vs  $fm$ , from male to female versus from female to male; E:  
399  $mf$  vs  $ff$ , from male to female versus among female; F:  $ff$  vs  $fm$ , among female versus from female to  
400 male).

401 Figure 9. Box-plot of relative ratio from 2005 to 2017 in Hubei ( $mm$ : among male;  $ff$ : among female;  
402  $fm$ : from female to male;  $mf$ : from male to female).

403

404 **Tables**

405 **Table 1. Variables with the intersex transmission SEIAR model**

| <b>Variable</b> | <b>Description</b>              | <b>Unit</b> |
|-----------------|---------------------------------|-------------|
| $S_m$           | Male susceptible individuals    | Individuals |
| $S_f$           | Female susceptible individuals  | Individuals |
| $E_m$           | Male exposed individuals        | Individuals |
| $E_f$           | Female exposed individuals      | Individuals |
| $I_m$           | Male infectious individuals     | Individuals |
| $I_f$           | Female infectious individuals   | Individuals |
| $A_m$           | Male asymptomatic individuals   | Individuals |
| $A_f$           | Female asymptomatic individuals | Individuals |
| $R_m$           | Male recovered individuals      | Individuals |
| $R_f$           | Female recovered individuals    | Individuals |
| $N$             | Total number of population      | Individuals |

406

407

**Table 2. Parameter description and values of SEIAR model**

| <b>Parameter</b> | <b>Description</b>                                                        | <b>Unit</b>                                   | <b>Value</b> | <b>Range</b>  | <b>Method</b>     |
|------------------|---------------------------------------------------------------------------|-----------------------------------------------|--------------|---------------|-------------------|
| $\beta_m$        | Relative rate of transmission among male individuals                      | Individuals <sup>-1</sup> ·days <sup>-1</sup> | —            | $\geq 0$      | Curve fitting     |
| $\beta_f$        | Relative rate of transmission among female individuals                    | Individuals <sup>-1</sup> ·days <sup>-1</sup> | —            | $\geq 0$      | Curve fitting     |
| $\beta_{fm}$     | Relative rate of transmission from female to male                         | Individuals <sup>-1</sup> ·days <sup>-1</sup> | —            | $\geq 0$      | Curve fitting     |
| $\beta_{mf}$     | Relative rate of transmission from male to female                         | Individuals <sup>-1</sup> ·days <sup>-1</sup> | —            | $\geq 0$      | Curve fitting     |
| $k$              | Relative transmissibility rate of asymptomatic to symptomatic individuals | 1                                             | 0.3125       | 0-1           | References[6]     |
| $p$              | Proportion of the asymptomatic                                            | 1                                             | 0.1          | 0.0037-0.2700 | References[13-15] |
| $\omega$         | Incubation relative rate                                                  | days <sup>-1</sup>                            | 1            | $\geq 0$      | References[6]     |



|           |                                               |        |        |               |                            |
|-----------|-----------------------------------------------|--------|--------|---------------|----------------------------|
| $\gamma$  | Recovery rate of the symptomatic individuals  | days-1 | 0.0741 | $\geq 0$      | References[6]              |
| $\gamma'$ | Recovery rate of the asymptomatic individuals | days-1 | 0.0286 | $\geq 0$      | References[6]              |
| $f$       | Fatality of the disease                       | 1      | 0      | 0-1           | References[16]             |
| $br$      | Birth rate of the population                  | 1      | —      | 0.0087-0.0126 | Hubei Statistical Yearbook |
| $dr$      | Death rate of the population                  | 1      | —      | 0.0057-0.0070 | Hubei Statistical Yearbook |

---

**Table 3.  $R^2$  of model and reported cases in different genders from 2005 to 2017 in Hubei**

**Province, China**

| Year | Male  |         | Female |         |
|------|-------|---------|--------|---------|
|      | $R^2$ | $p$     | $R^2$  | $p$     |
| 2005 | 0.989 | < 0.001 | 0.991  | < 0.001 |
| 2006 | 0.995 | < 0.001 | 0.992  | < 0.001 |
| 2007 | 0.992 | < 0.001 | 0.987  | < 0.001 |
| 2008 | 0.984 | < 0.001 | 0.986  | < 0.001 |
| 2009 | 0.982 | < 0.001 | 0.984  | < 0.001 |
| 2010 | 0.989 | < 0.001 | 0.982  | < 0.001 |
| 2011 | 0.985 | < 0.001 | 0.982  | < 0.001 |
| 2012 | 0.989 | < 0.001 | 0.979  | < 0.001 |
| 2013 | 0.977 | < 0.001 | 0.983  | < 0.001 |
| 2014 | 0.986 | < 0.001 | 0.983  | < 0.001 |
| 2015 | 0.977 | < 0.001 | 0.965  | < 0.001 |
| 2016 | 0.985 | < 0.001 | 0.988  | < 0.001 |
| 2017 | 0.986 | < 0.001 | 0.978  | < 0.001 |

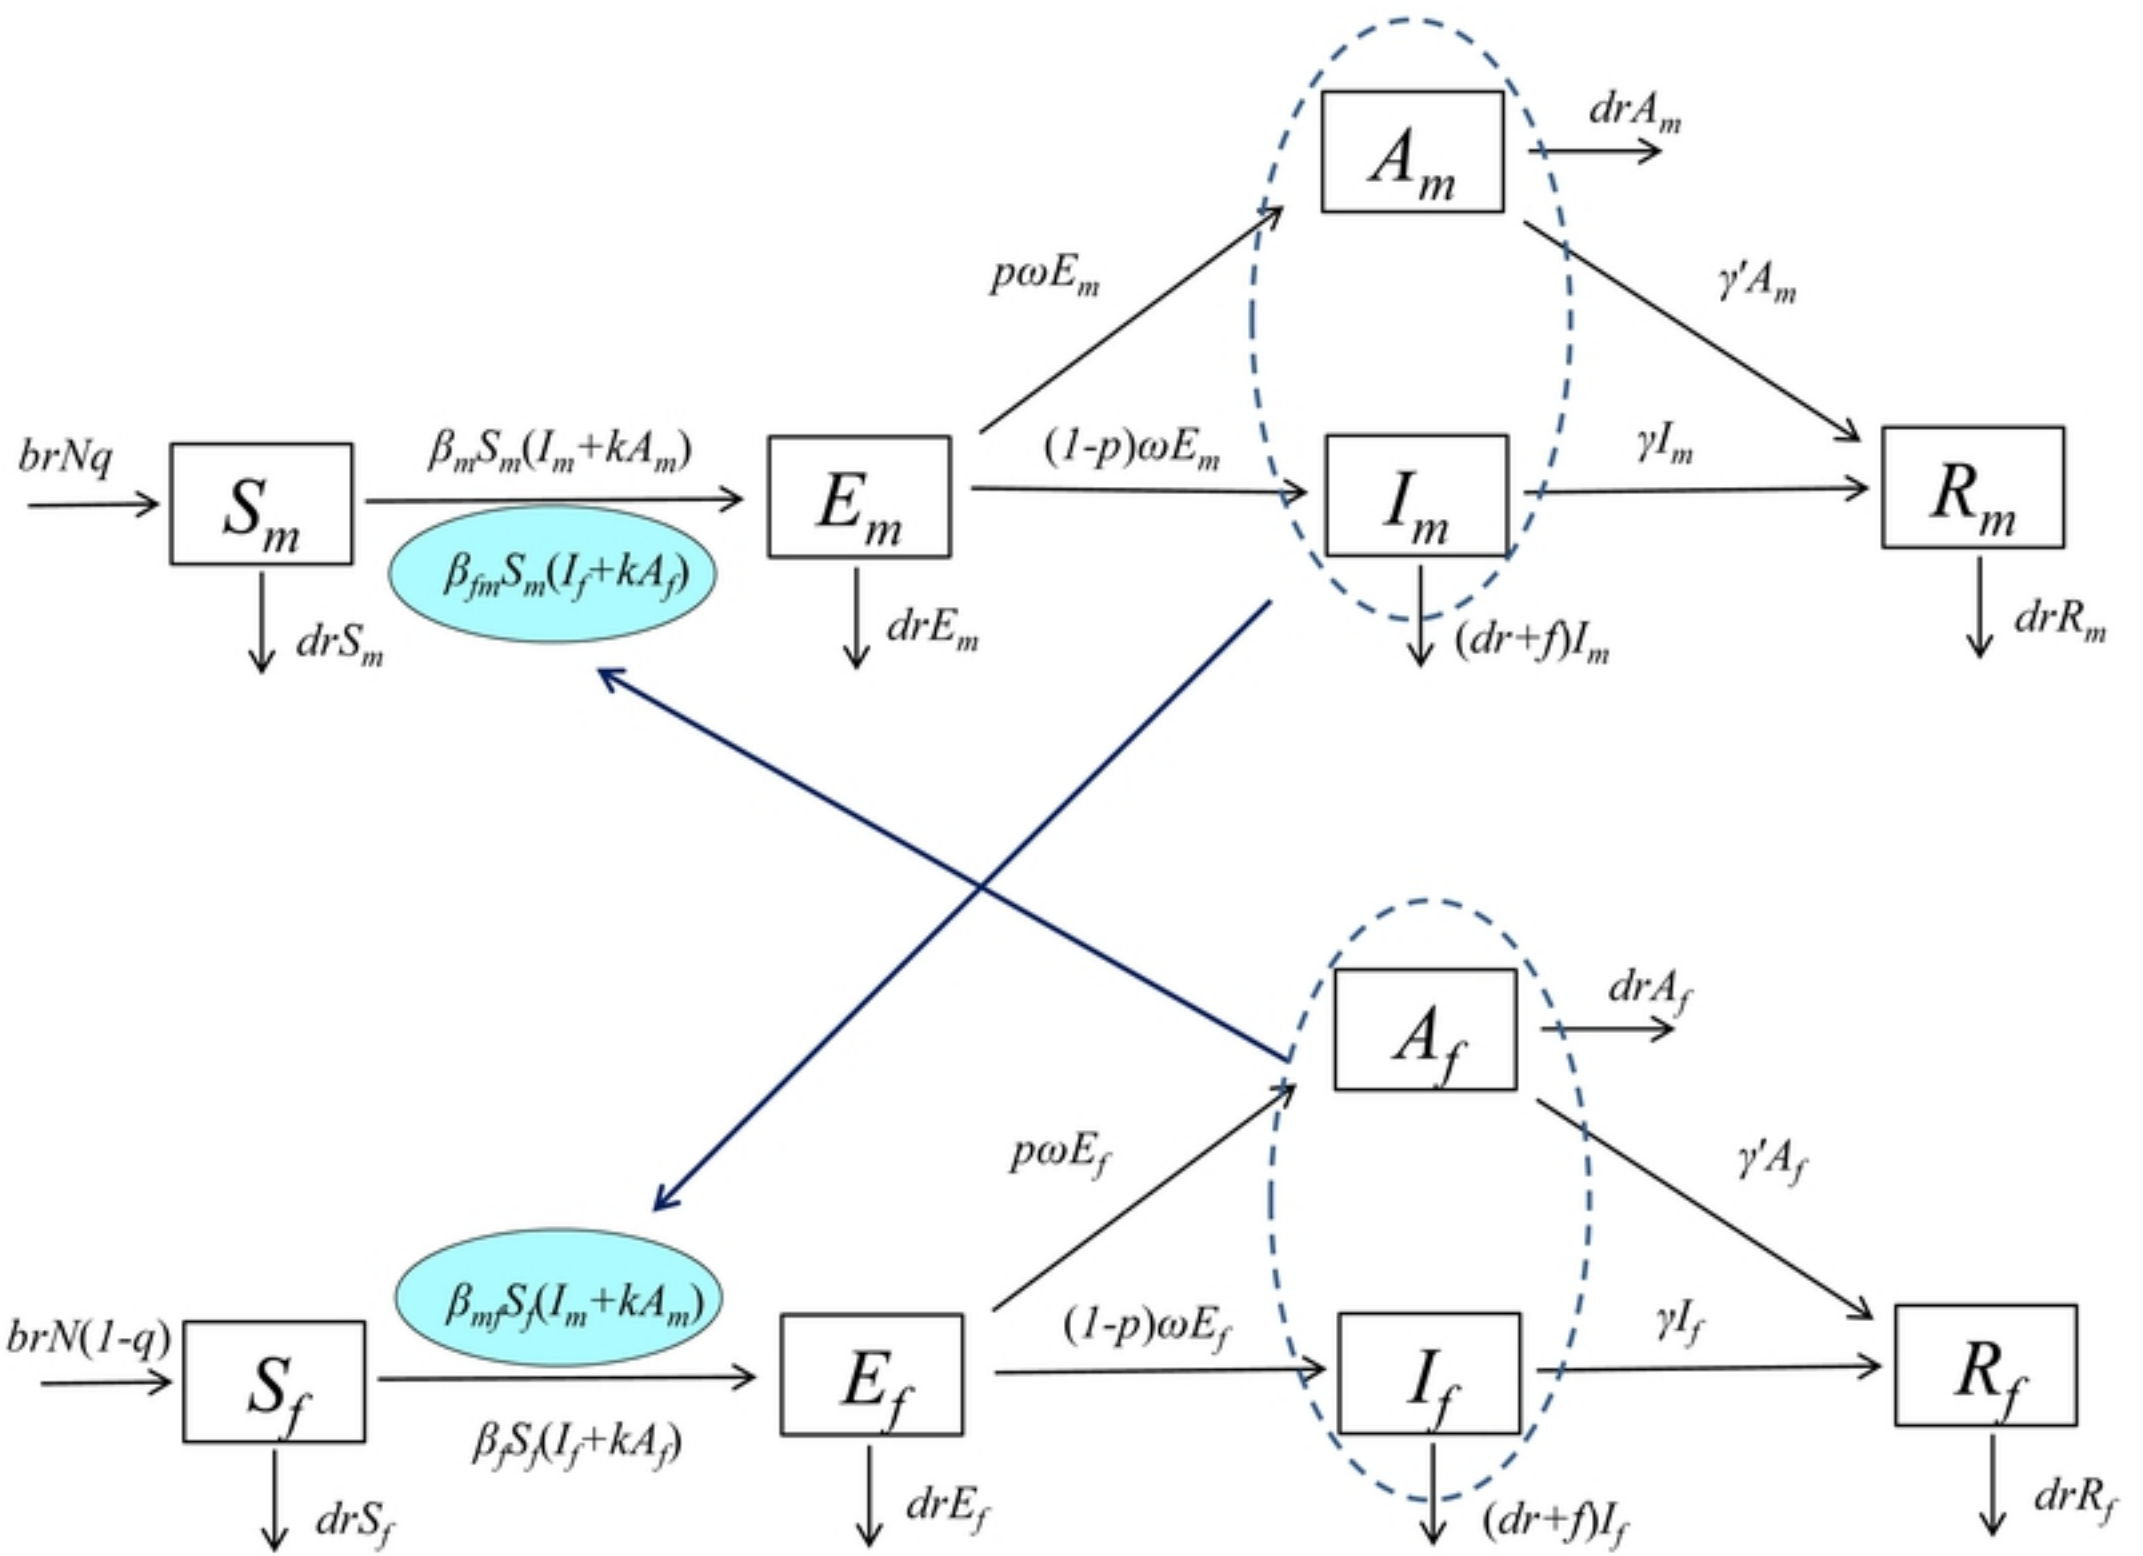

Figure 1

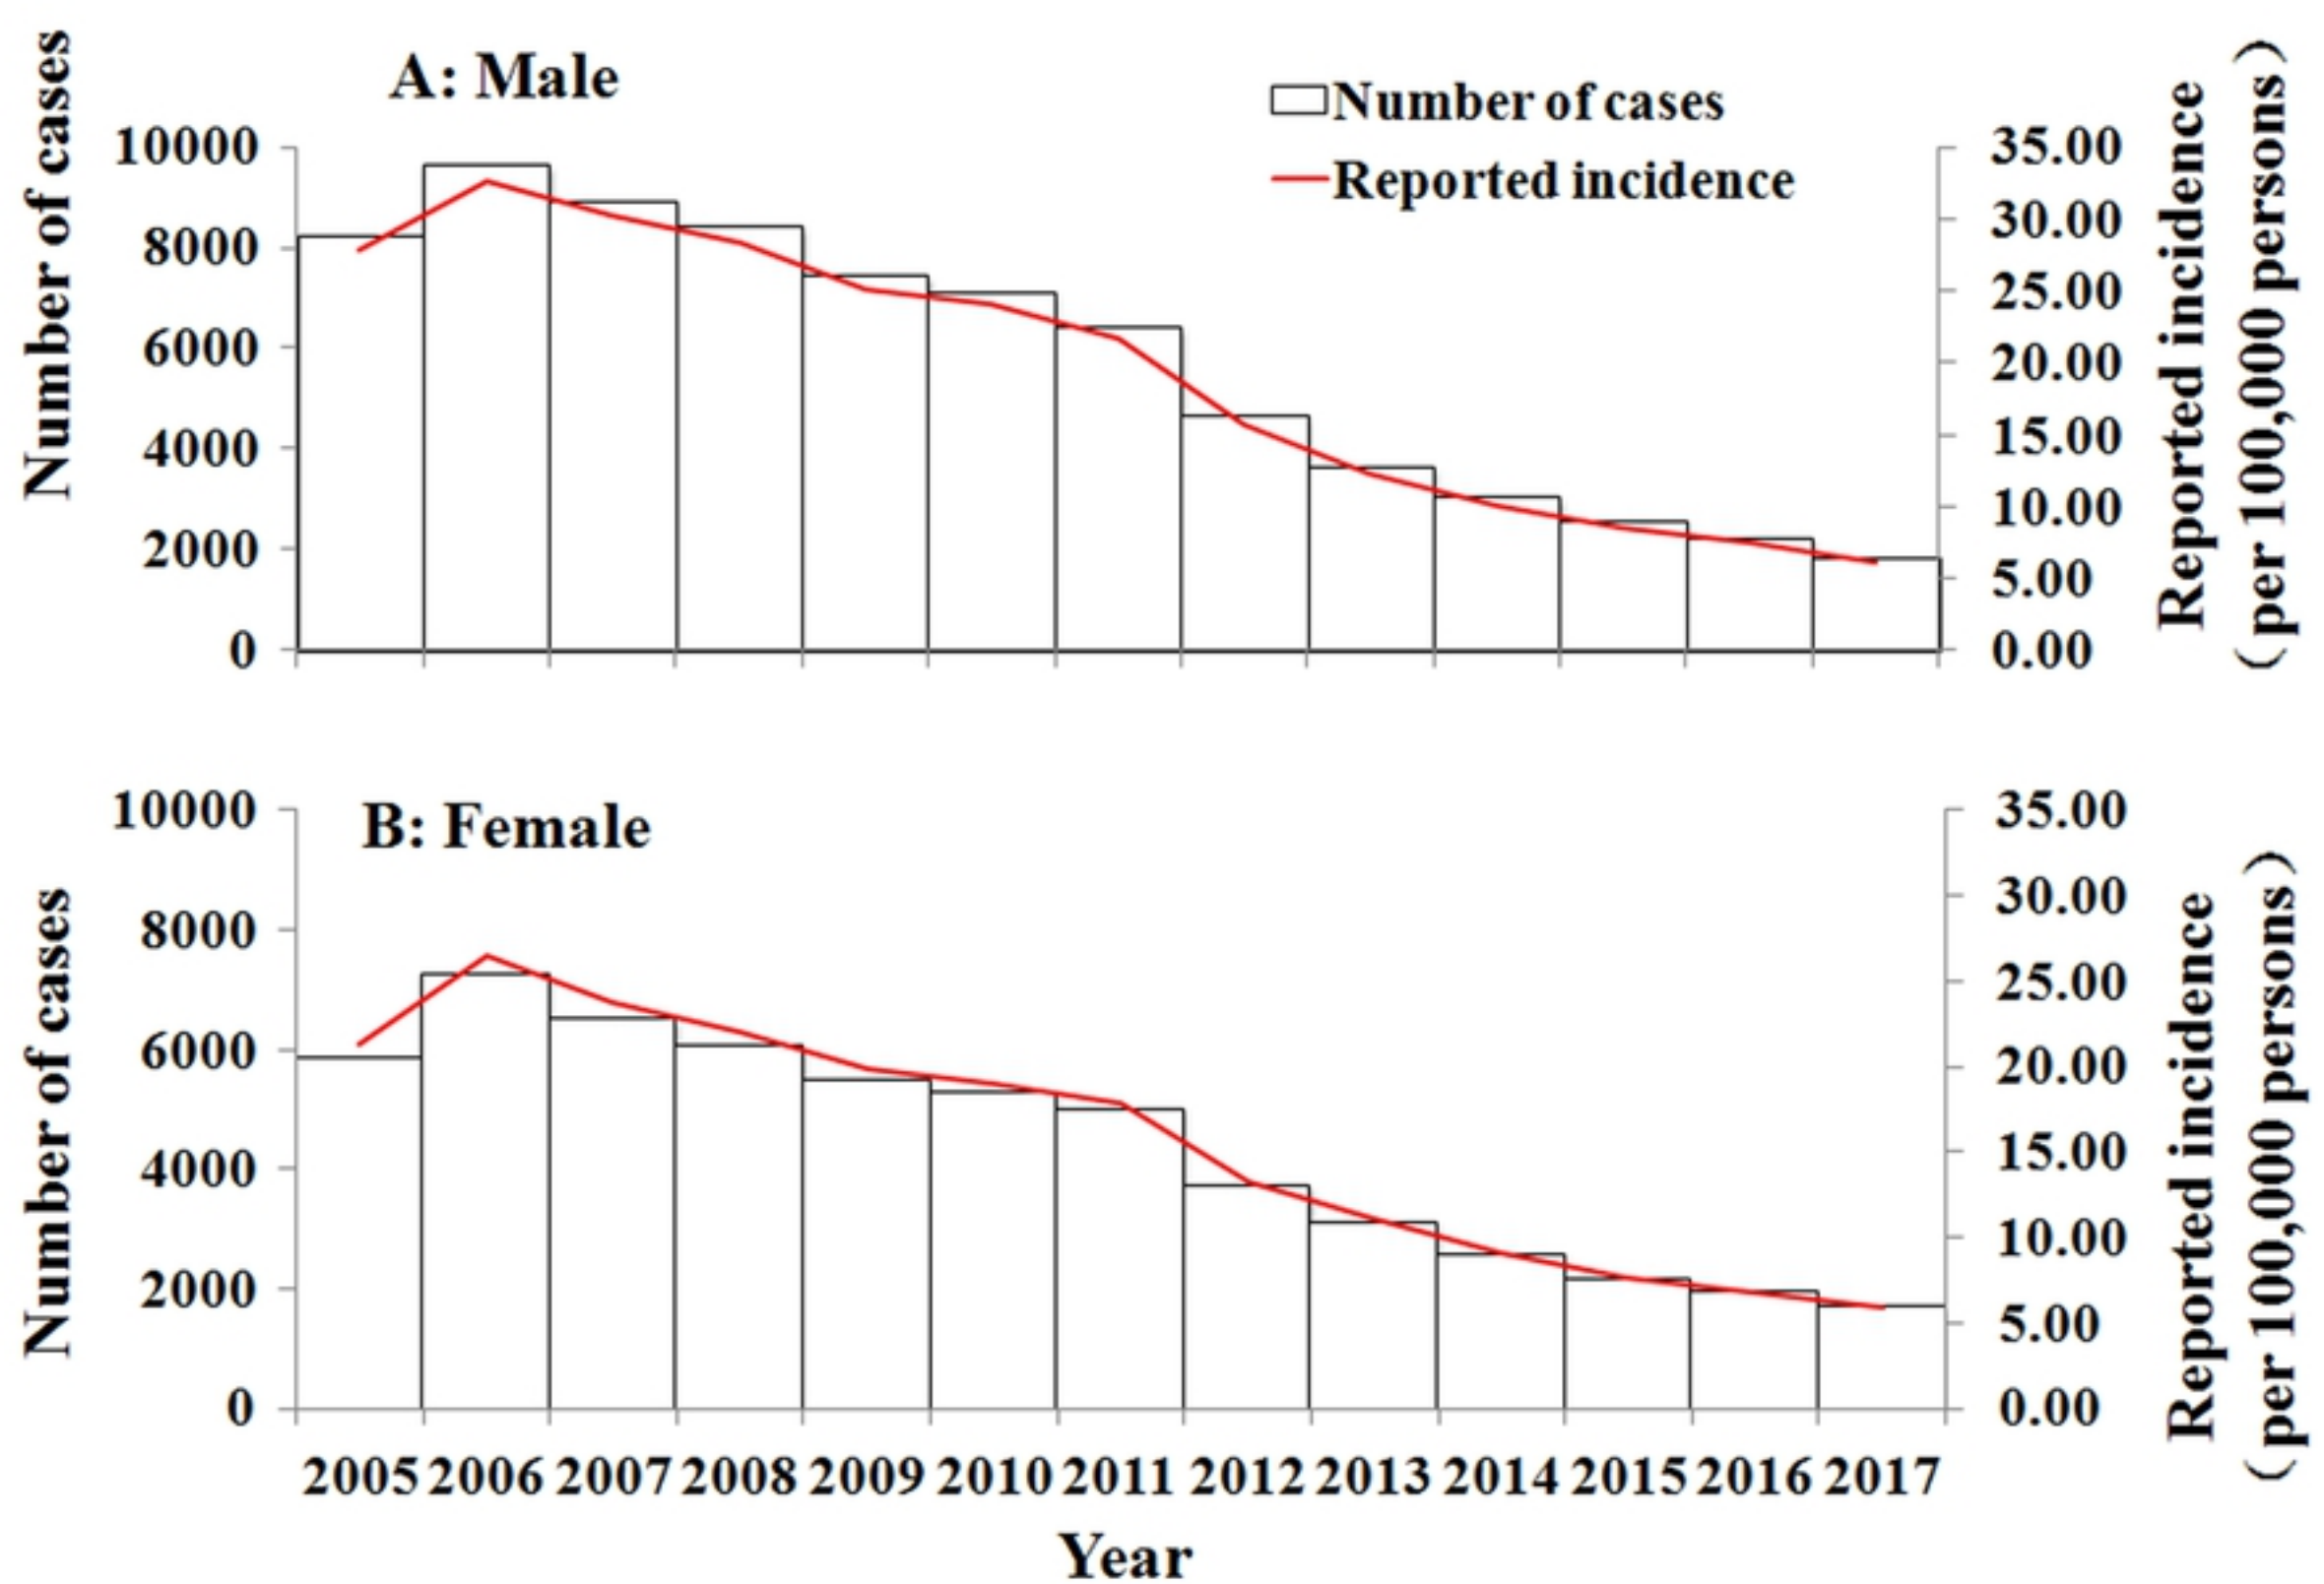

Figure 2

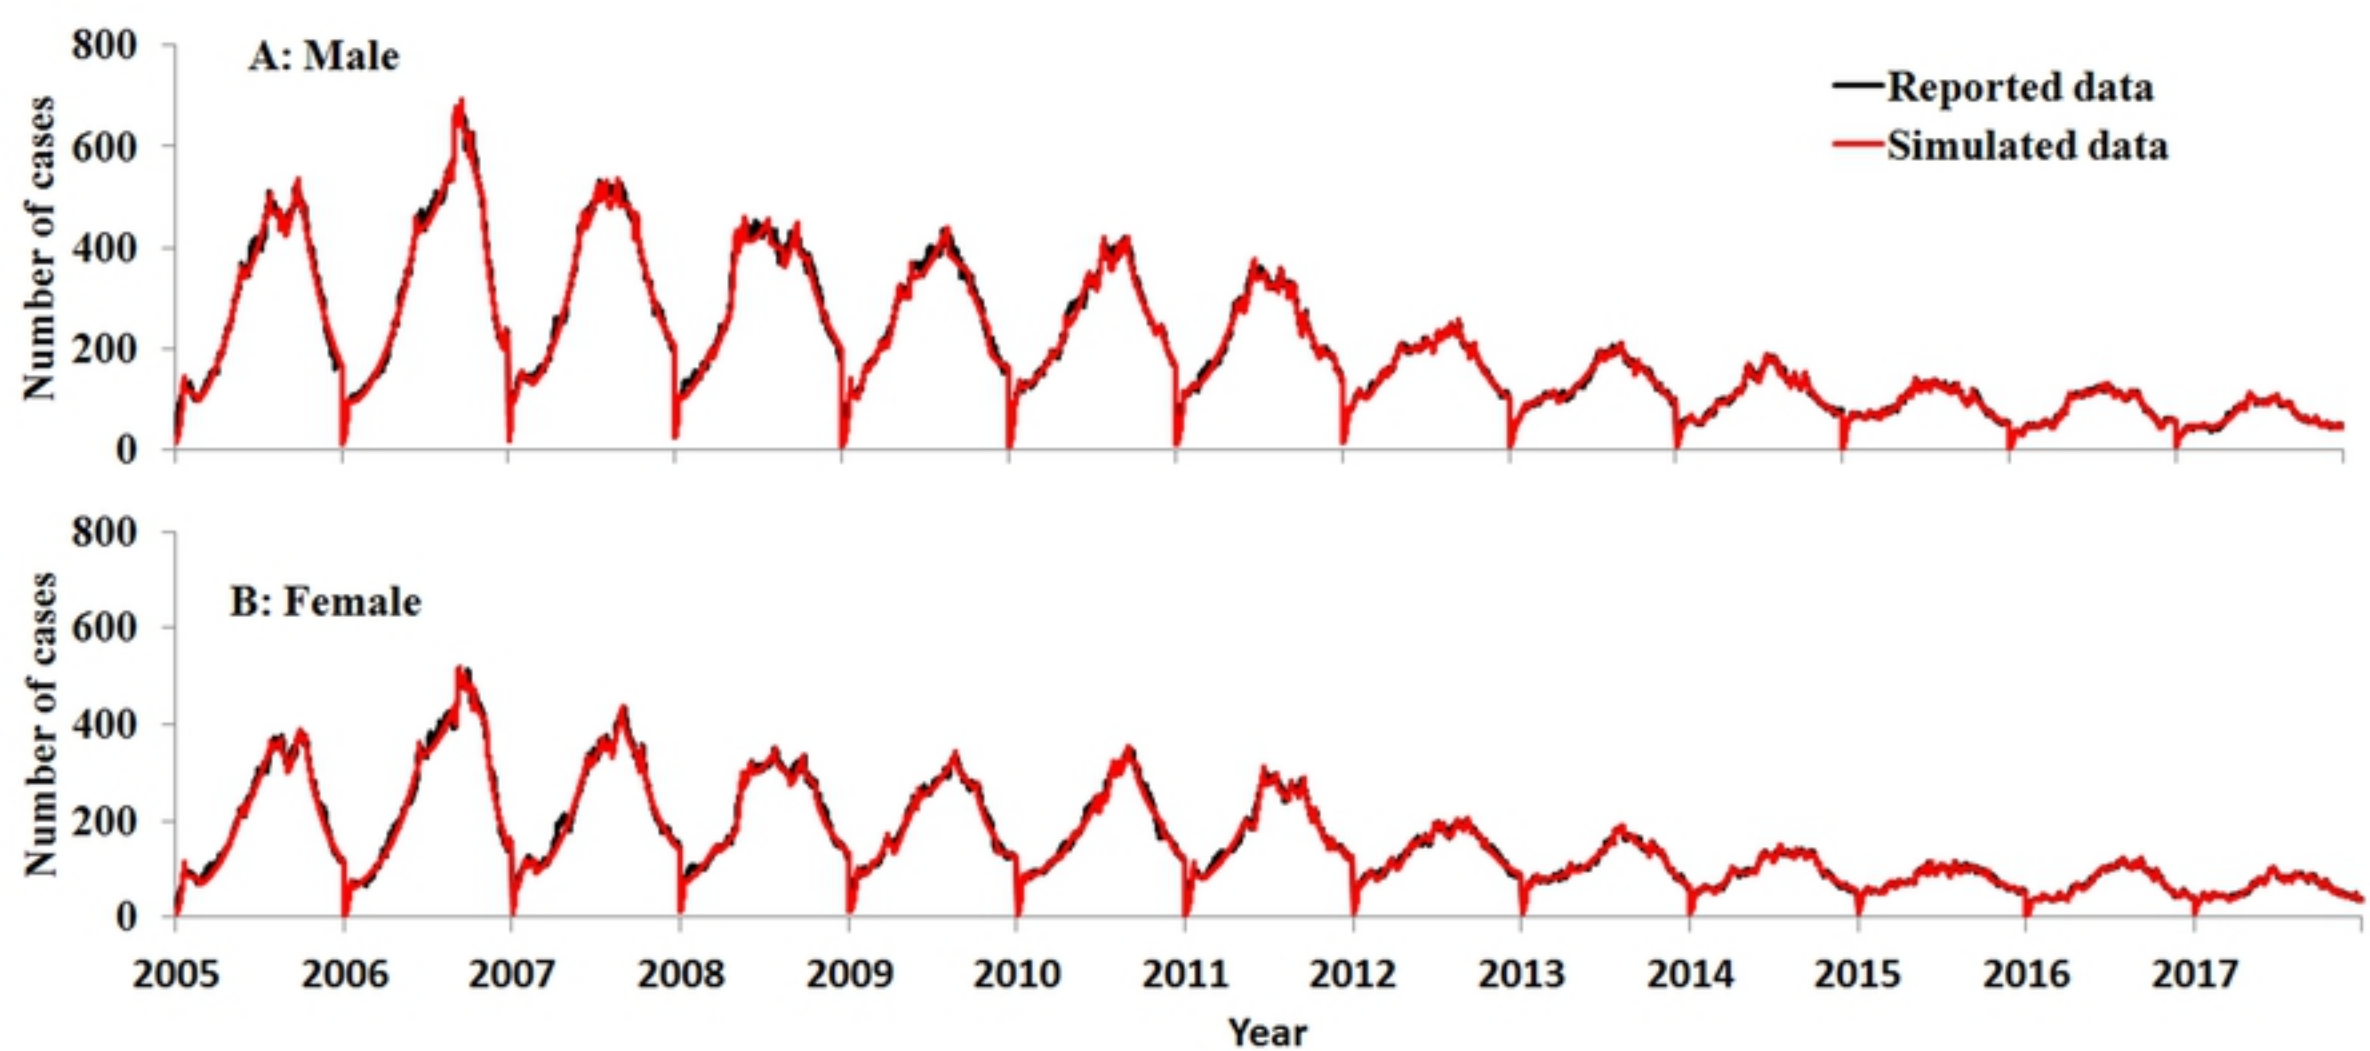

Figure 3

### A: Male

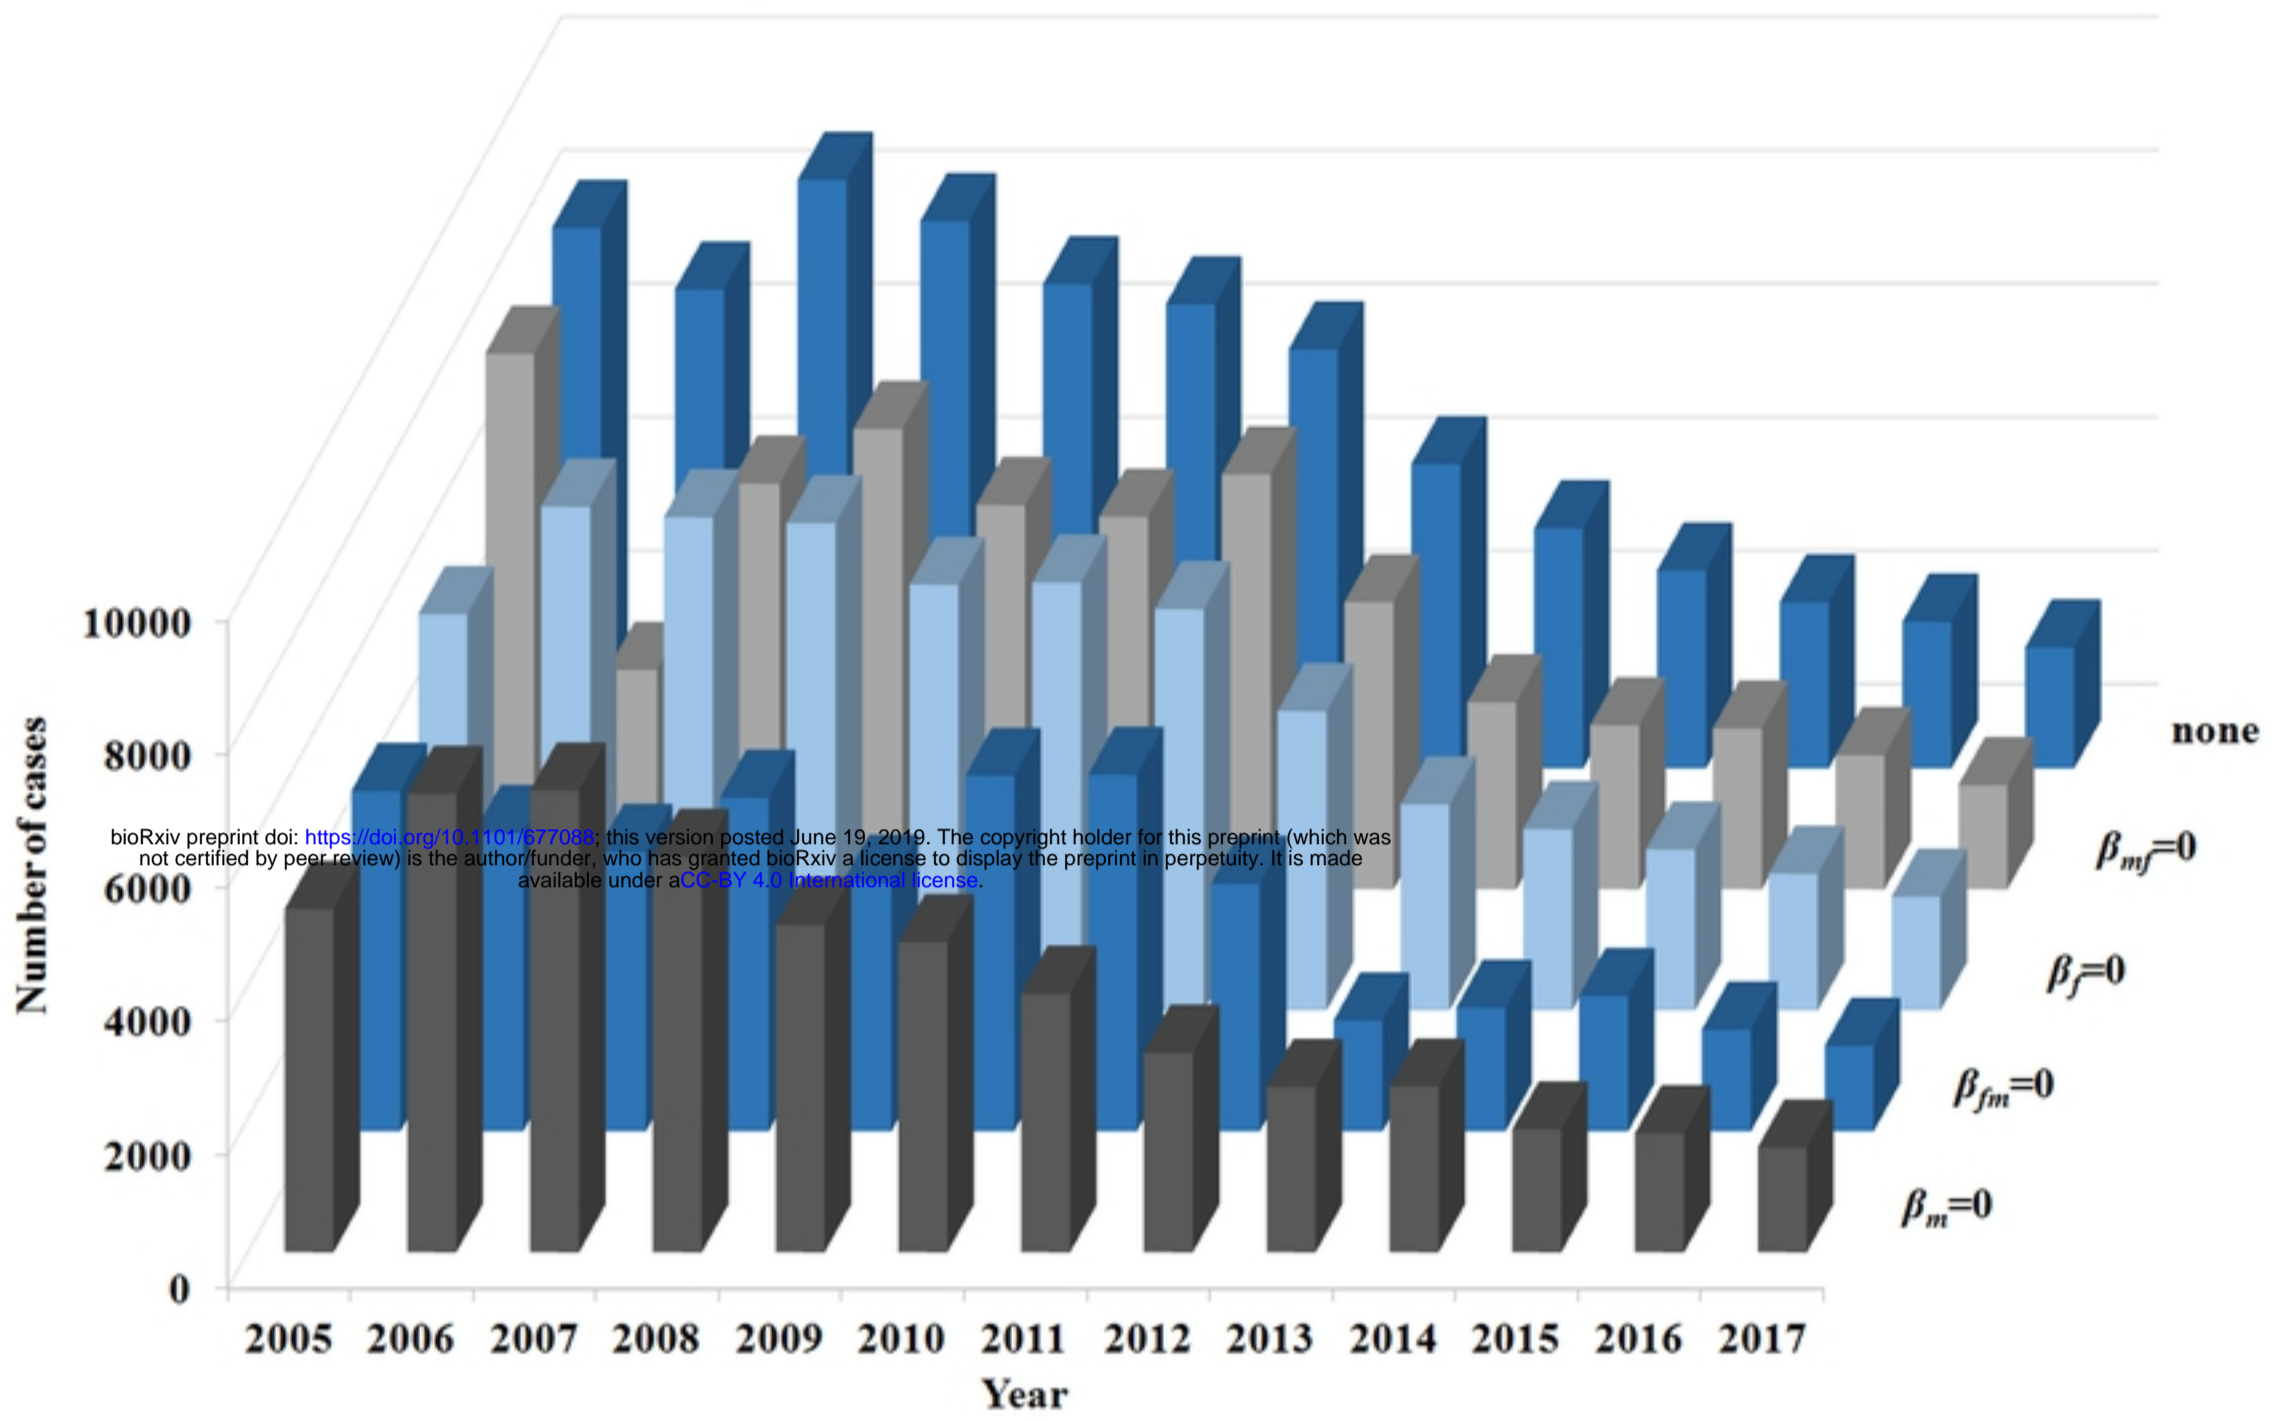

### B: Female

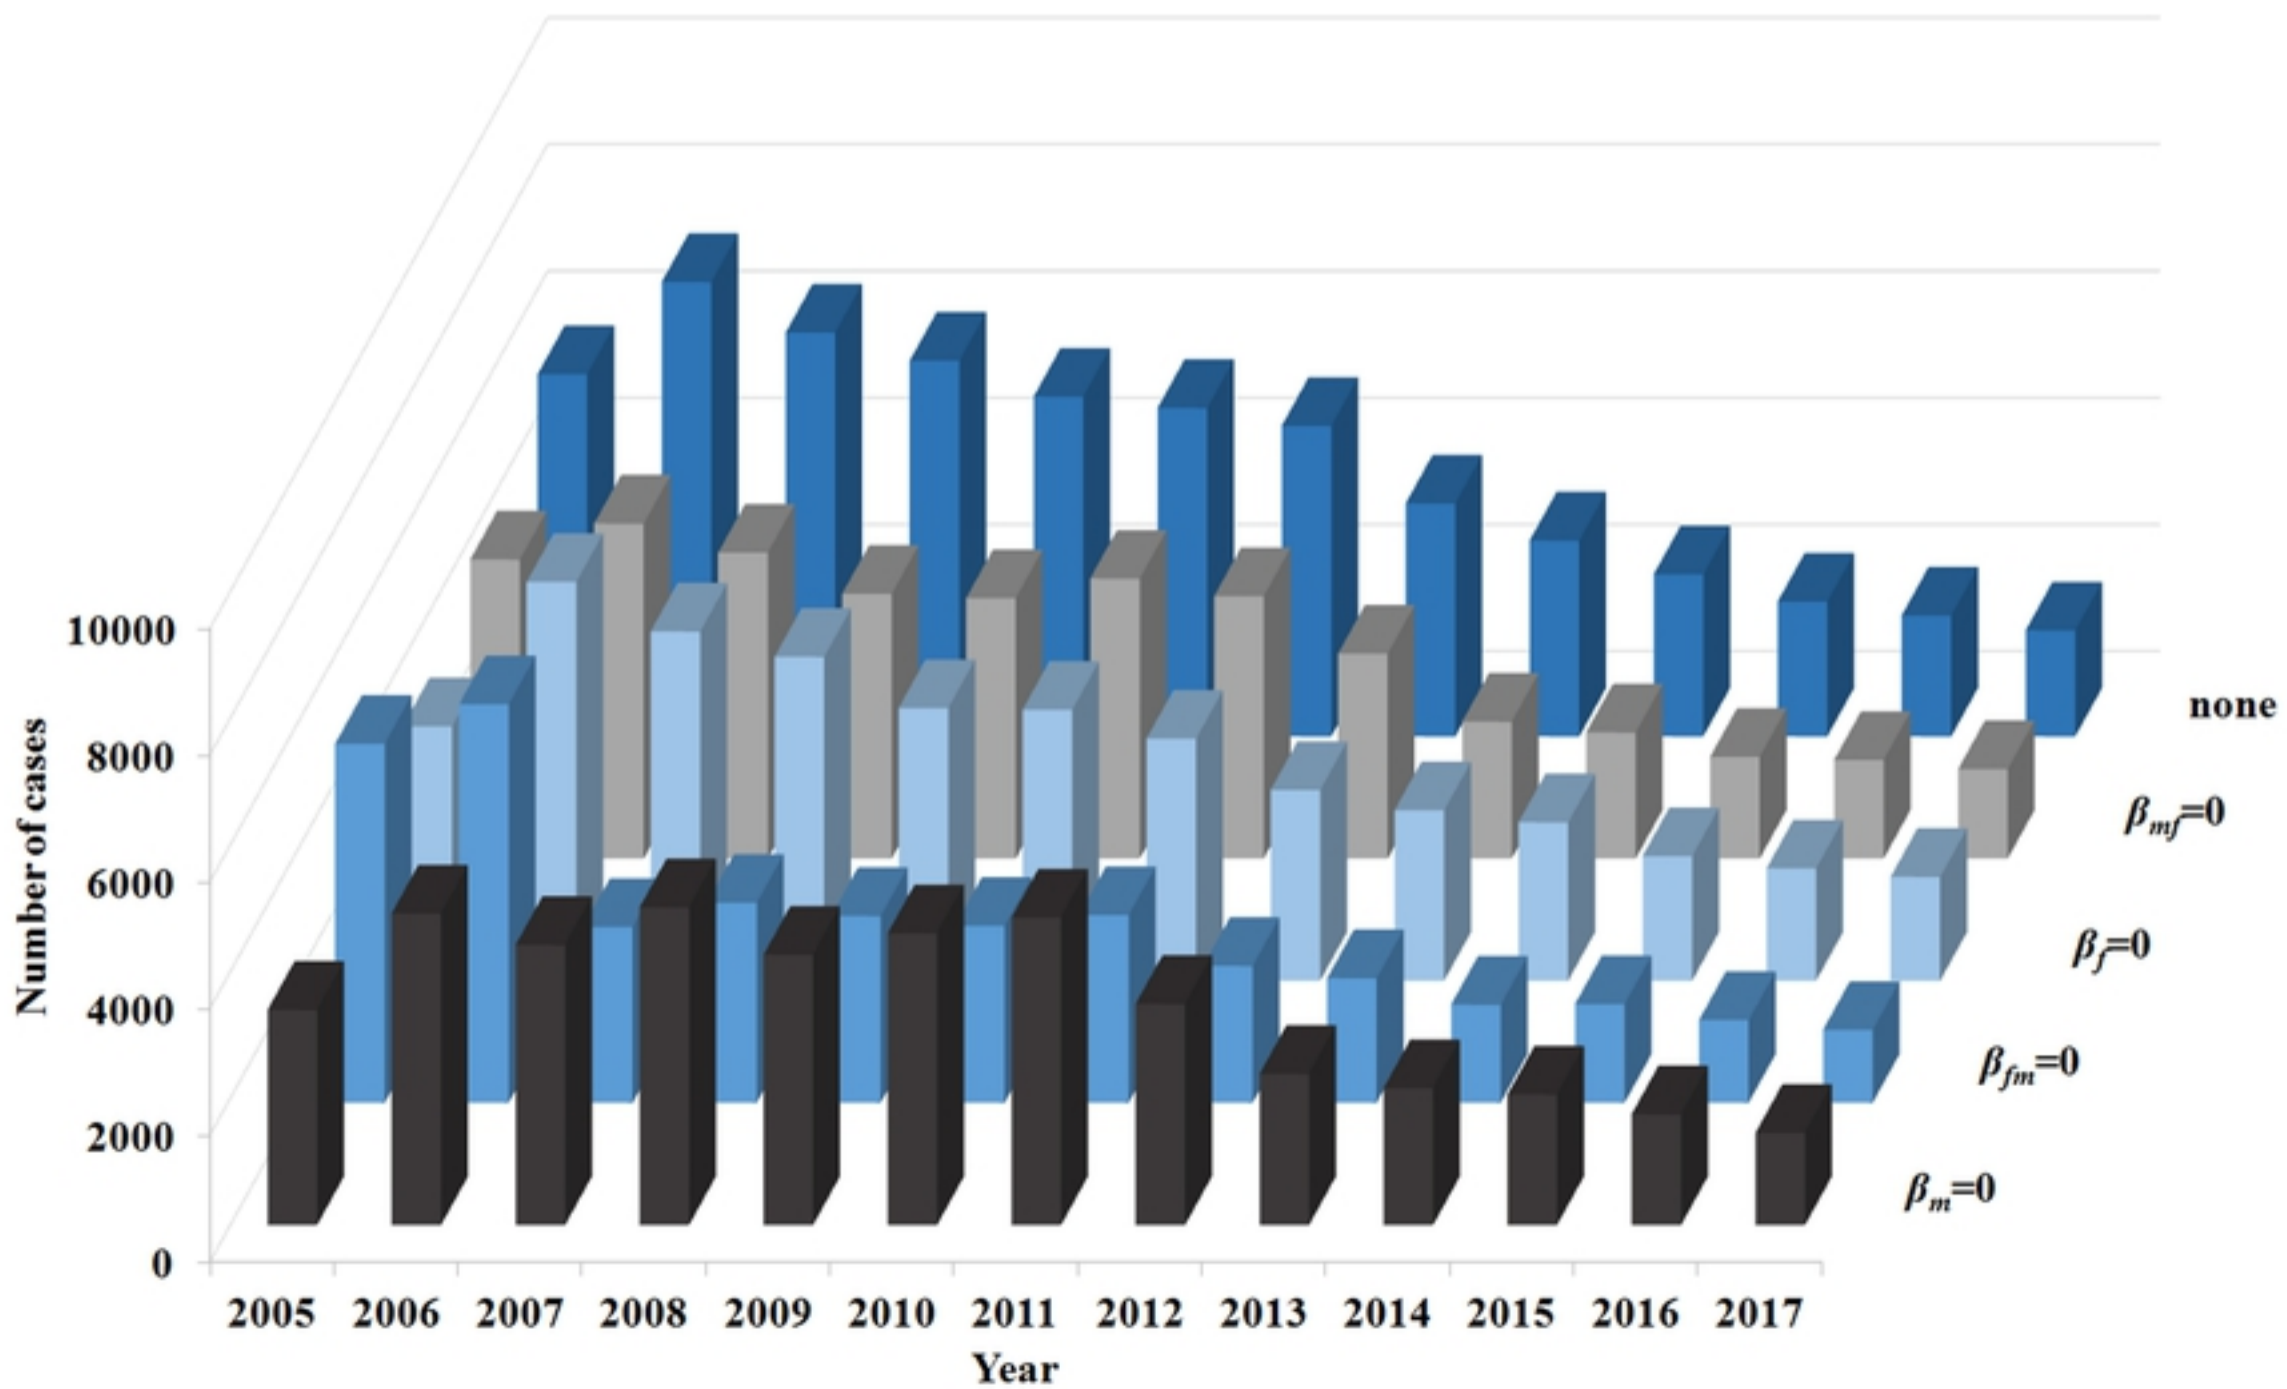

Figure 4



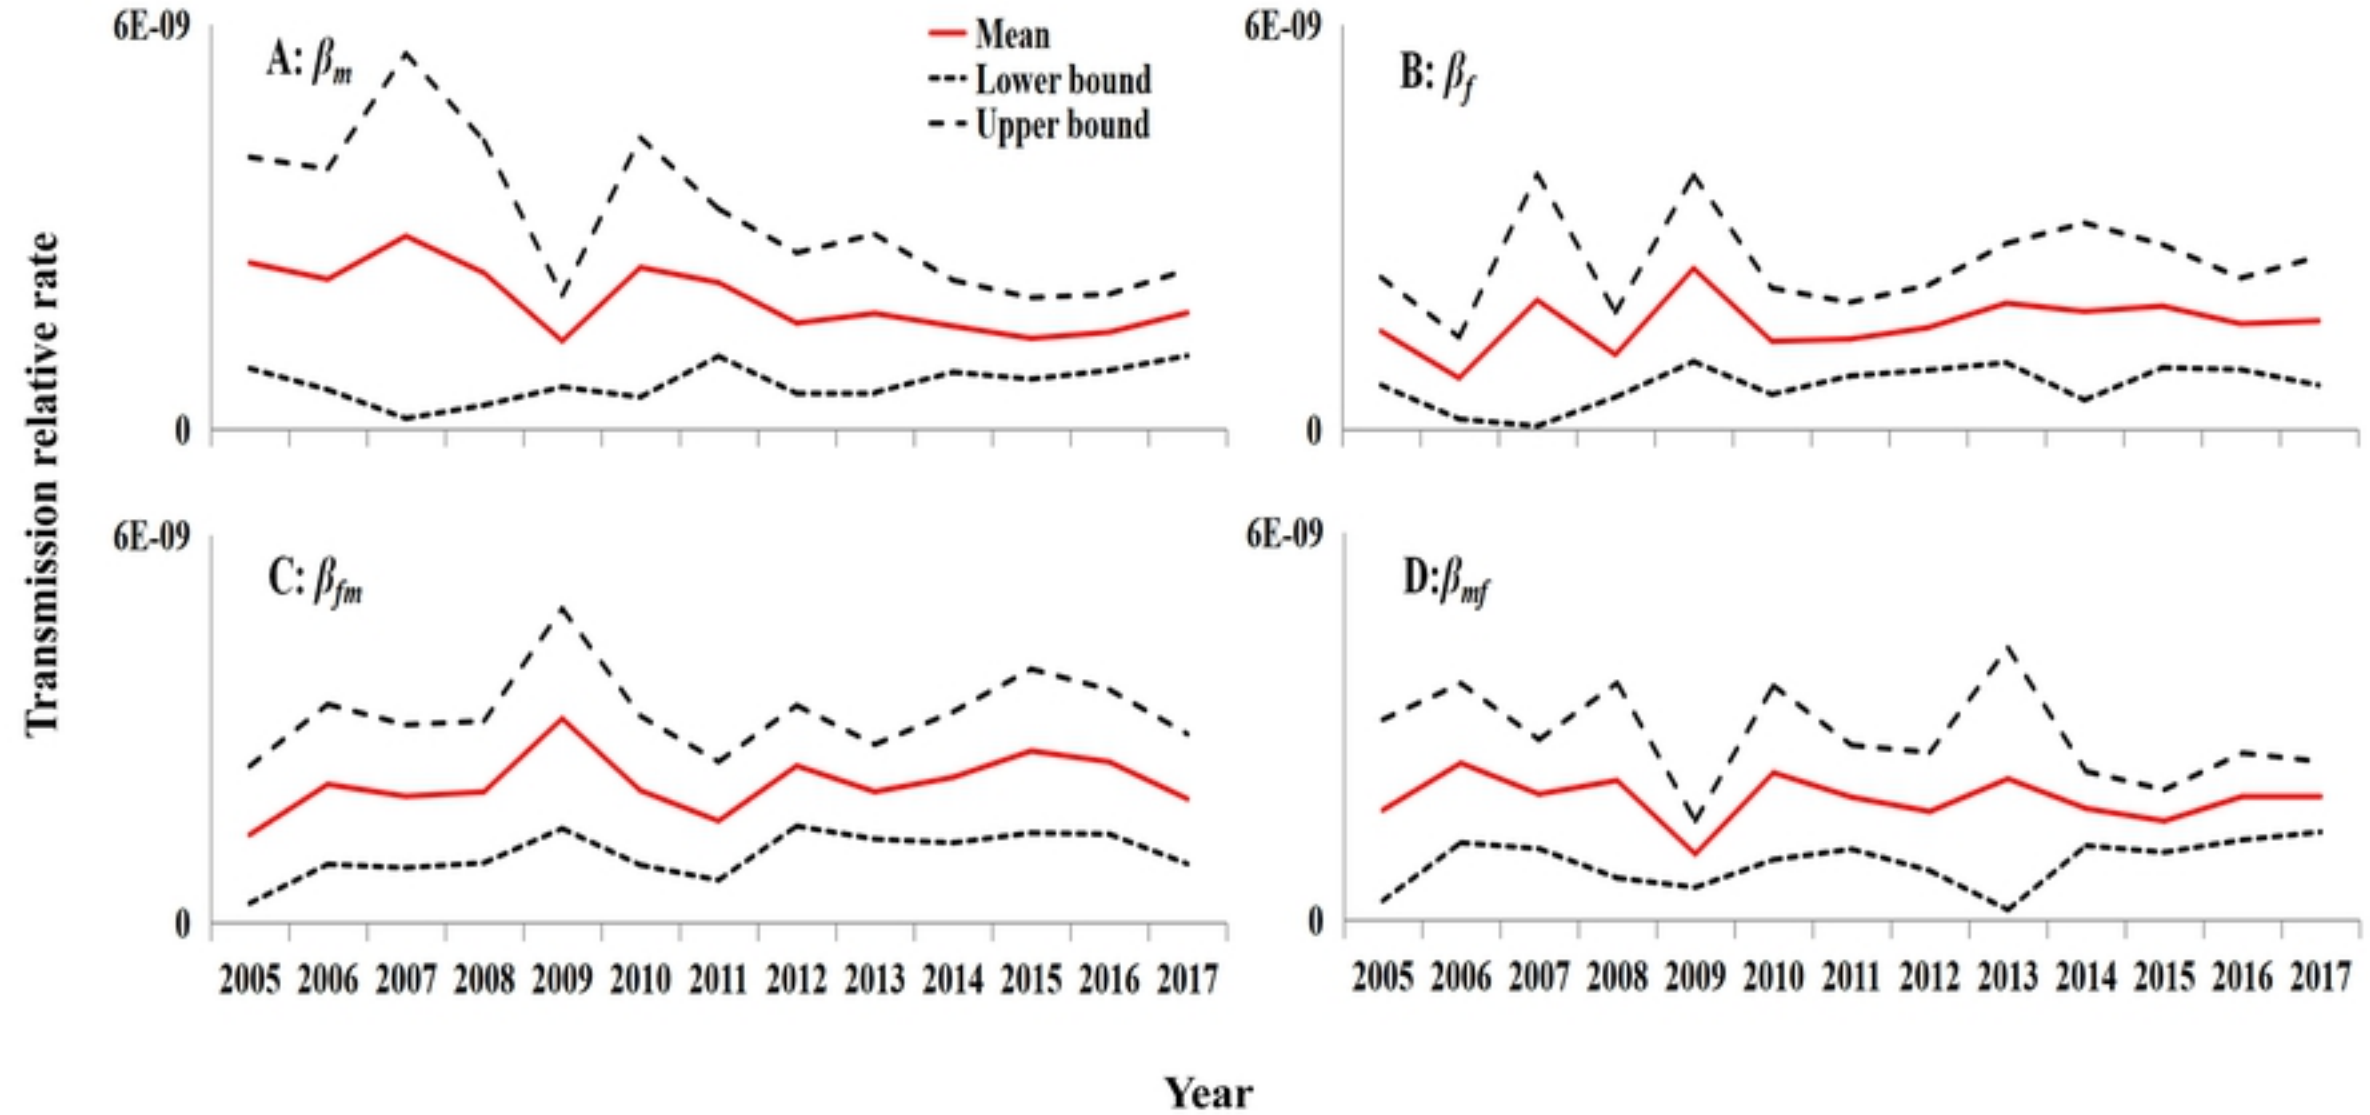

Figure 5

Parameter of SAR

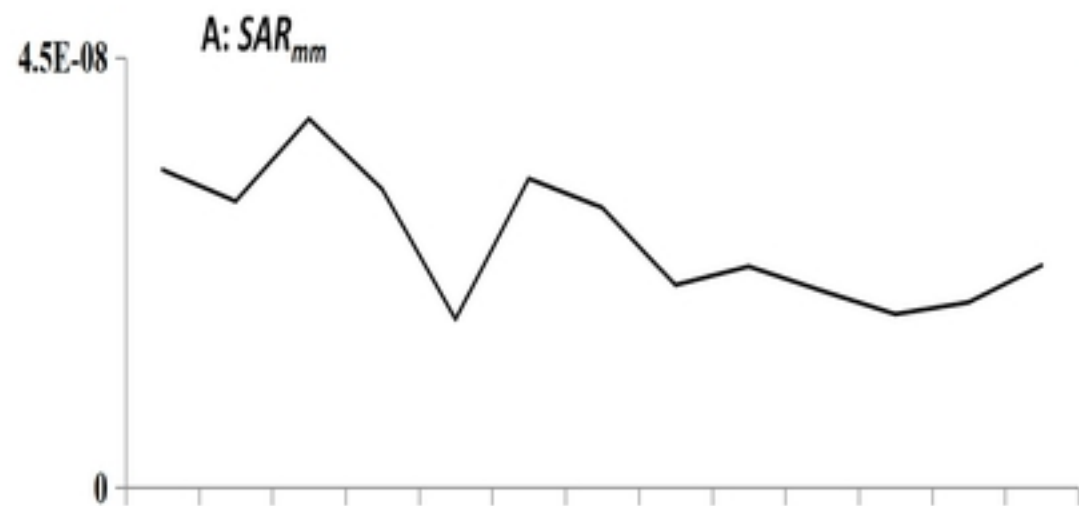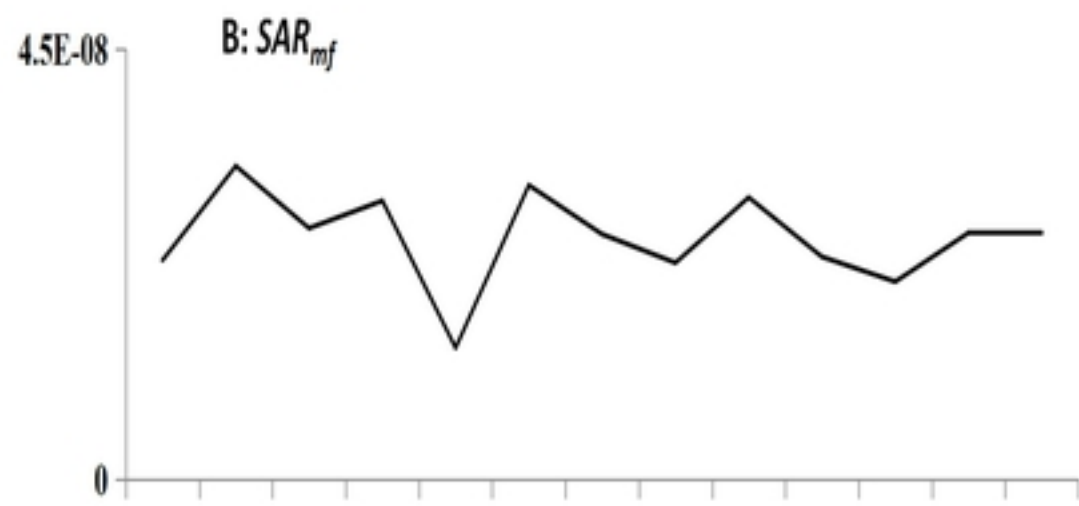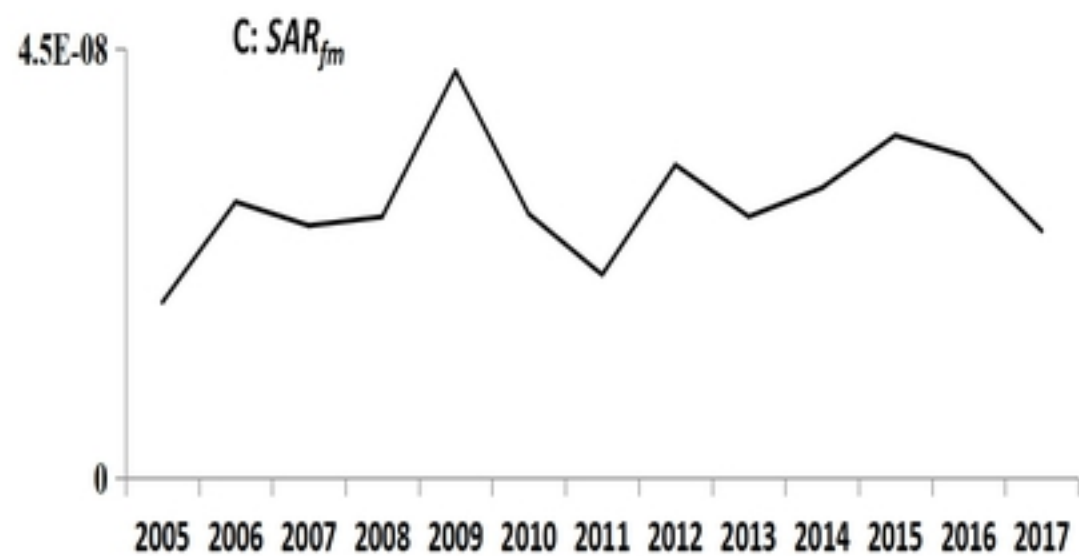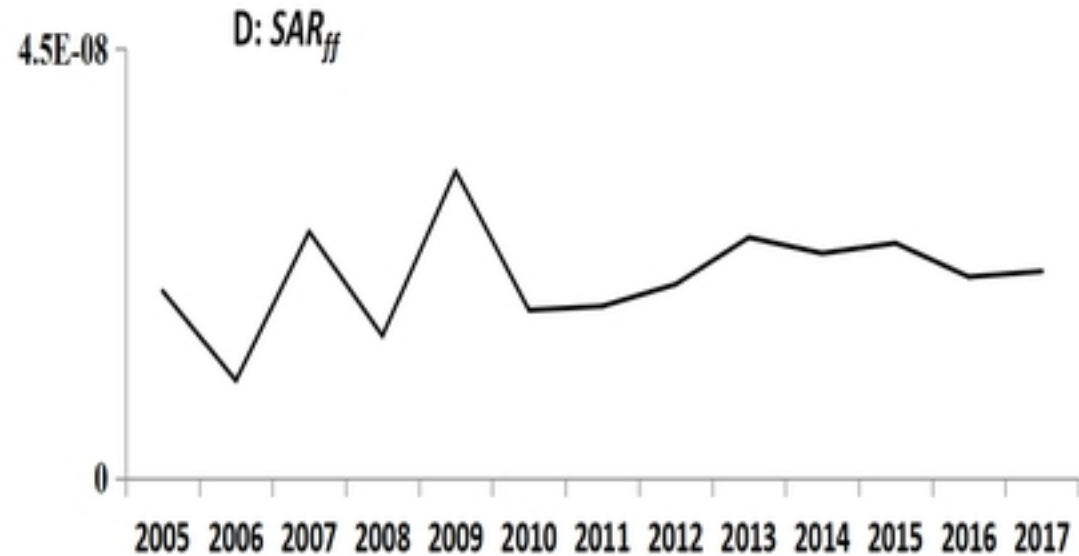

Year

Figure 6



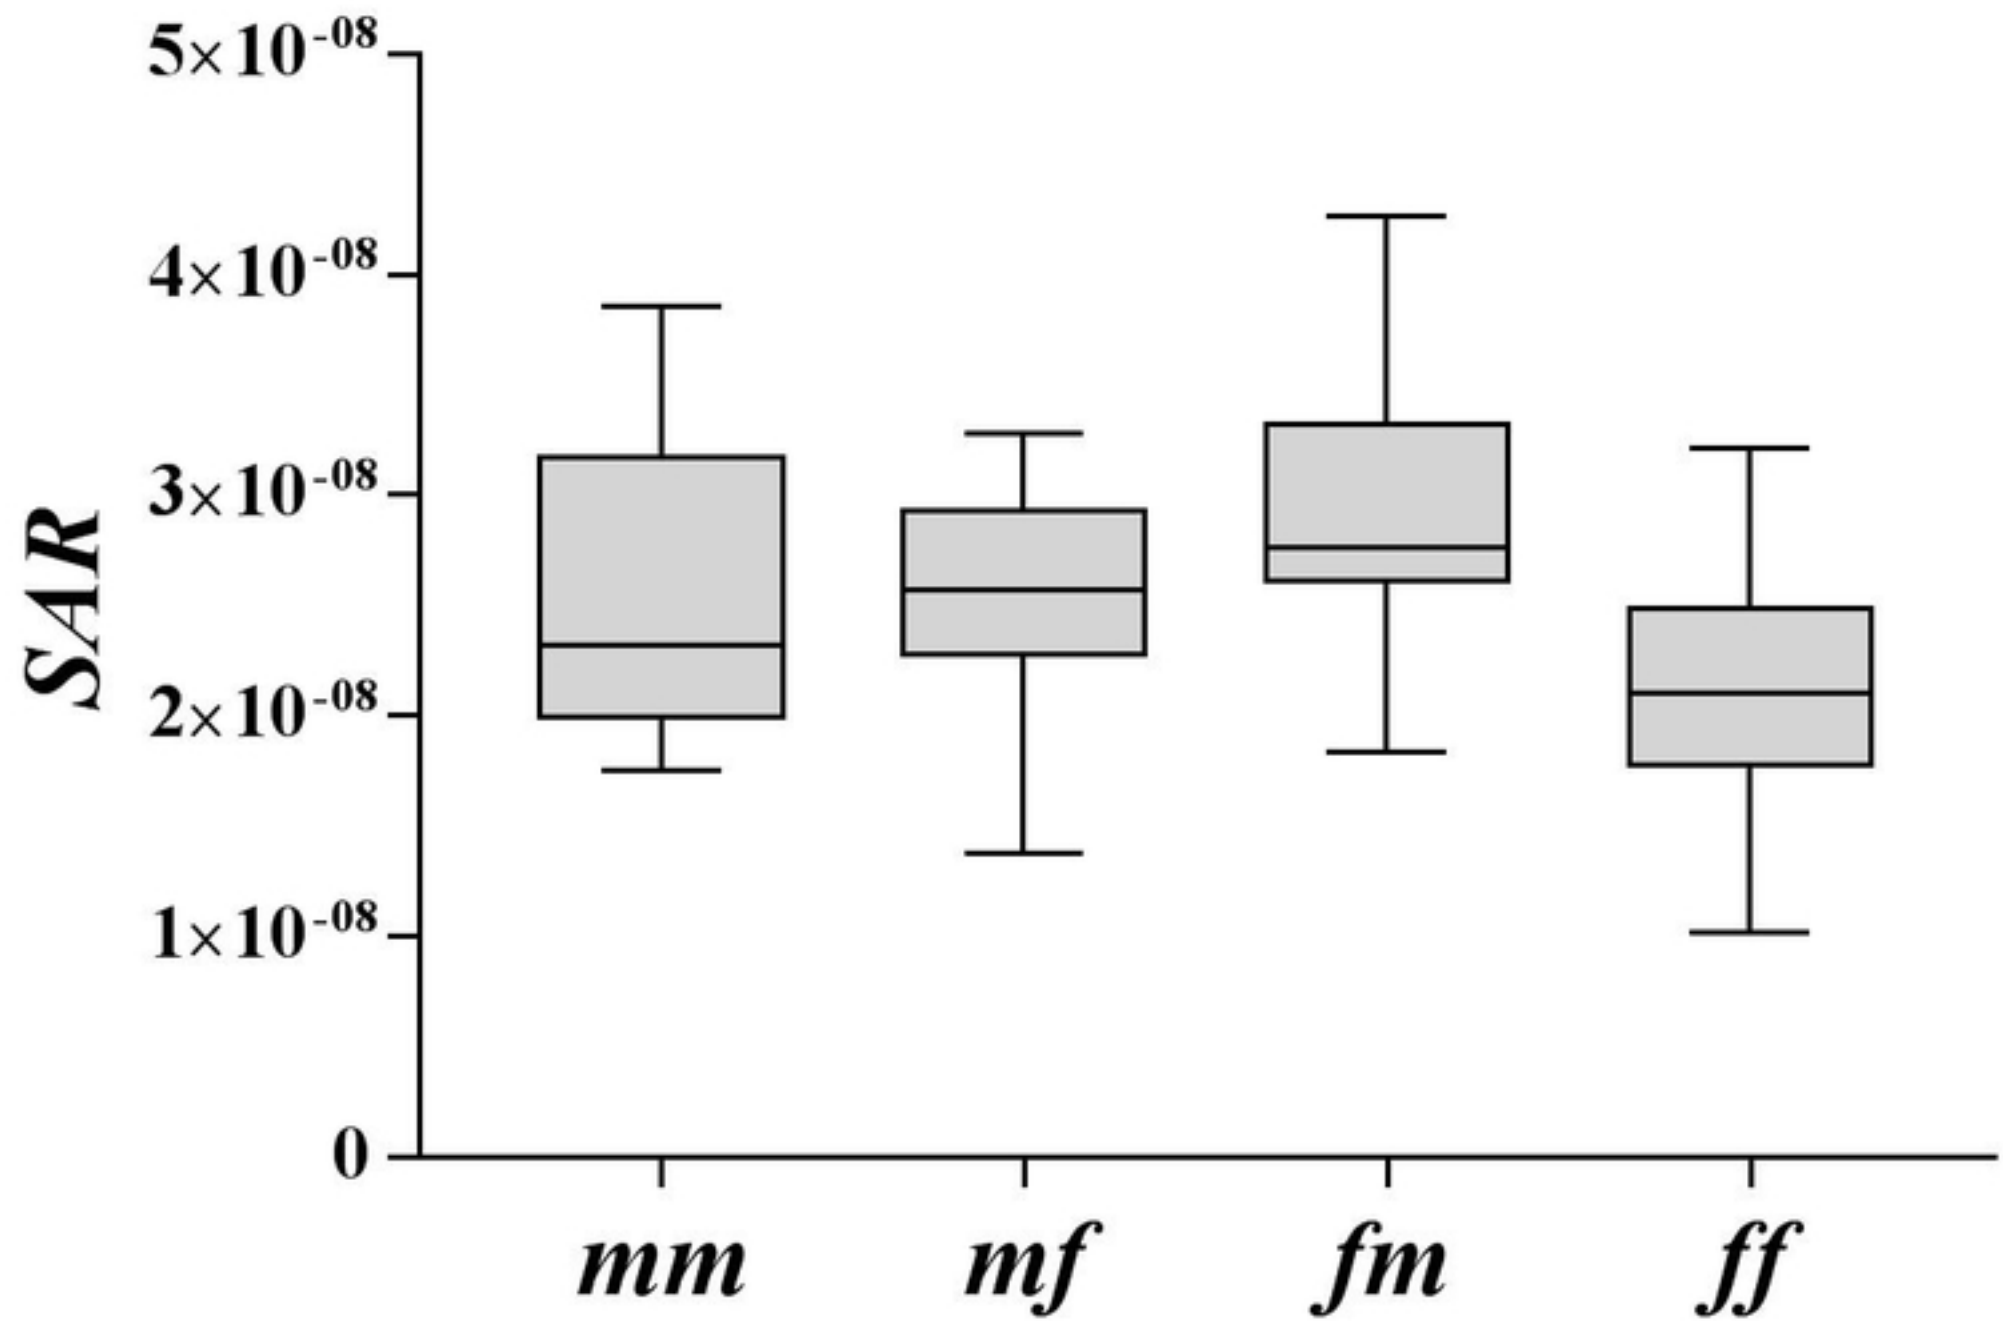

Figure 7

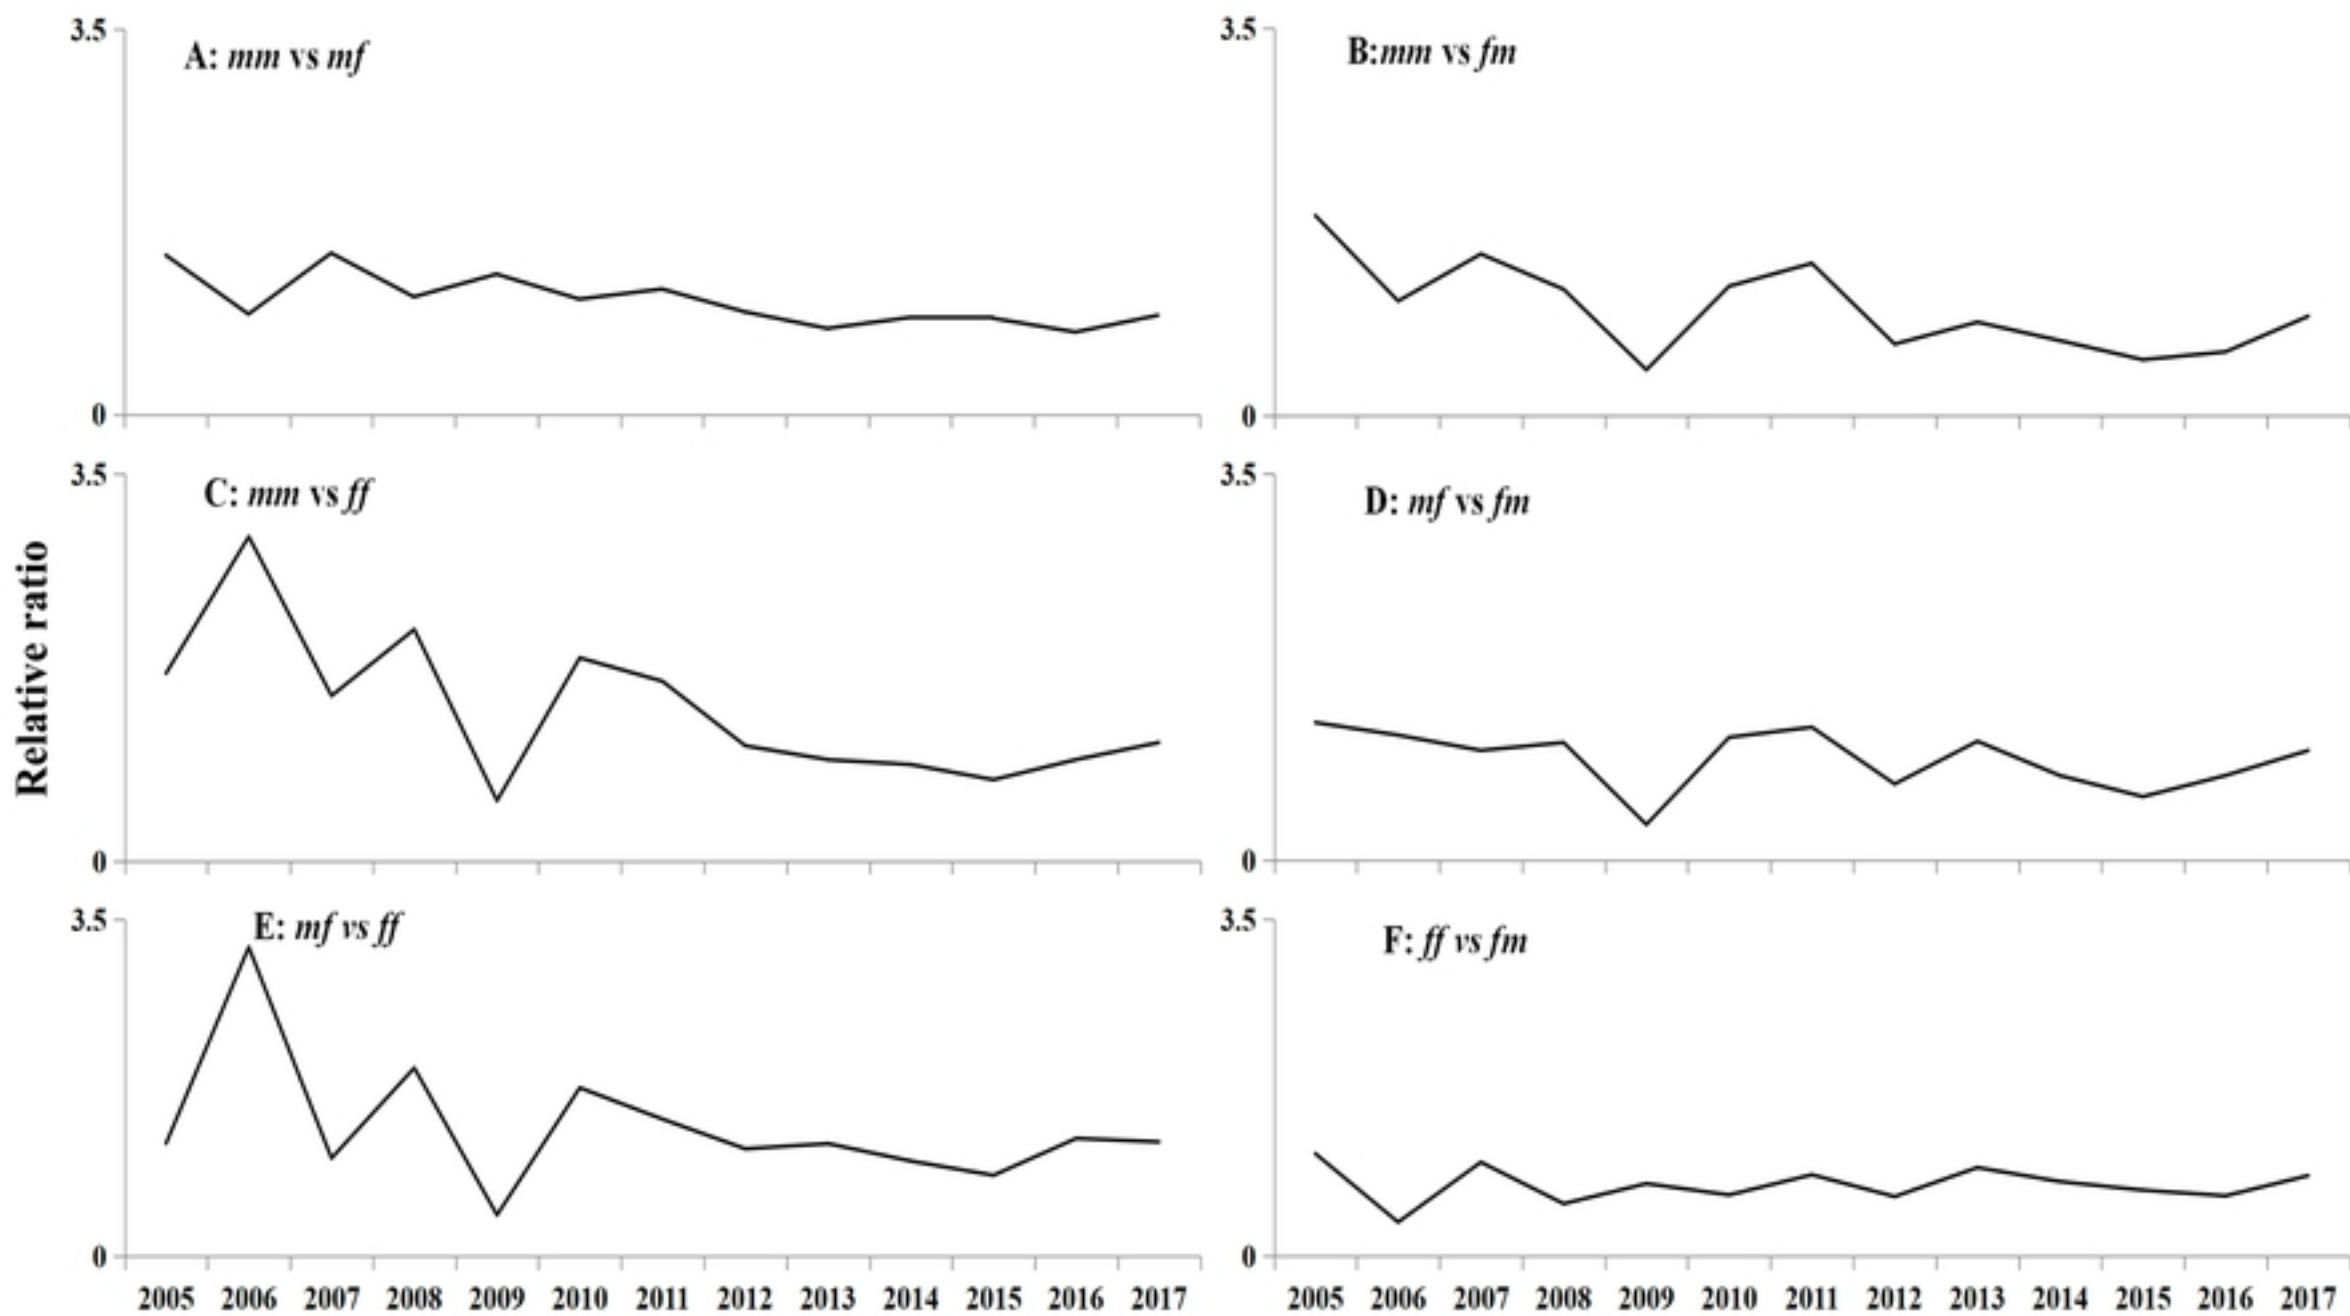

Figure 8

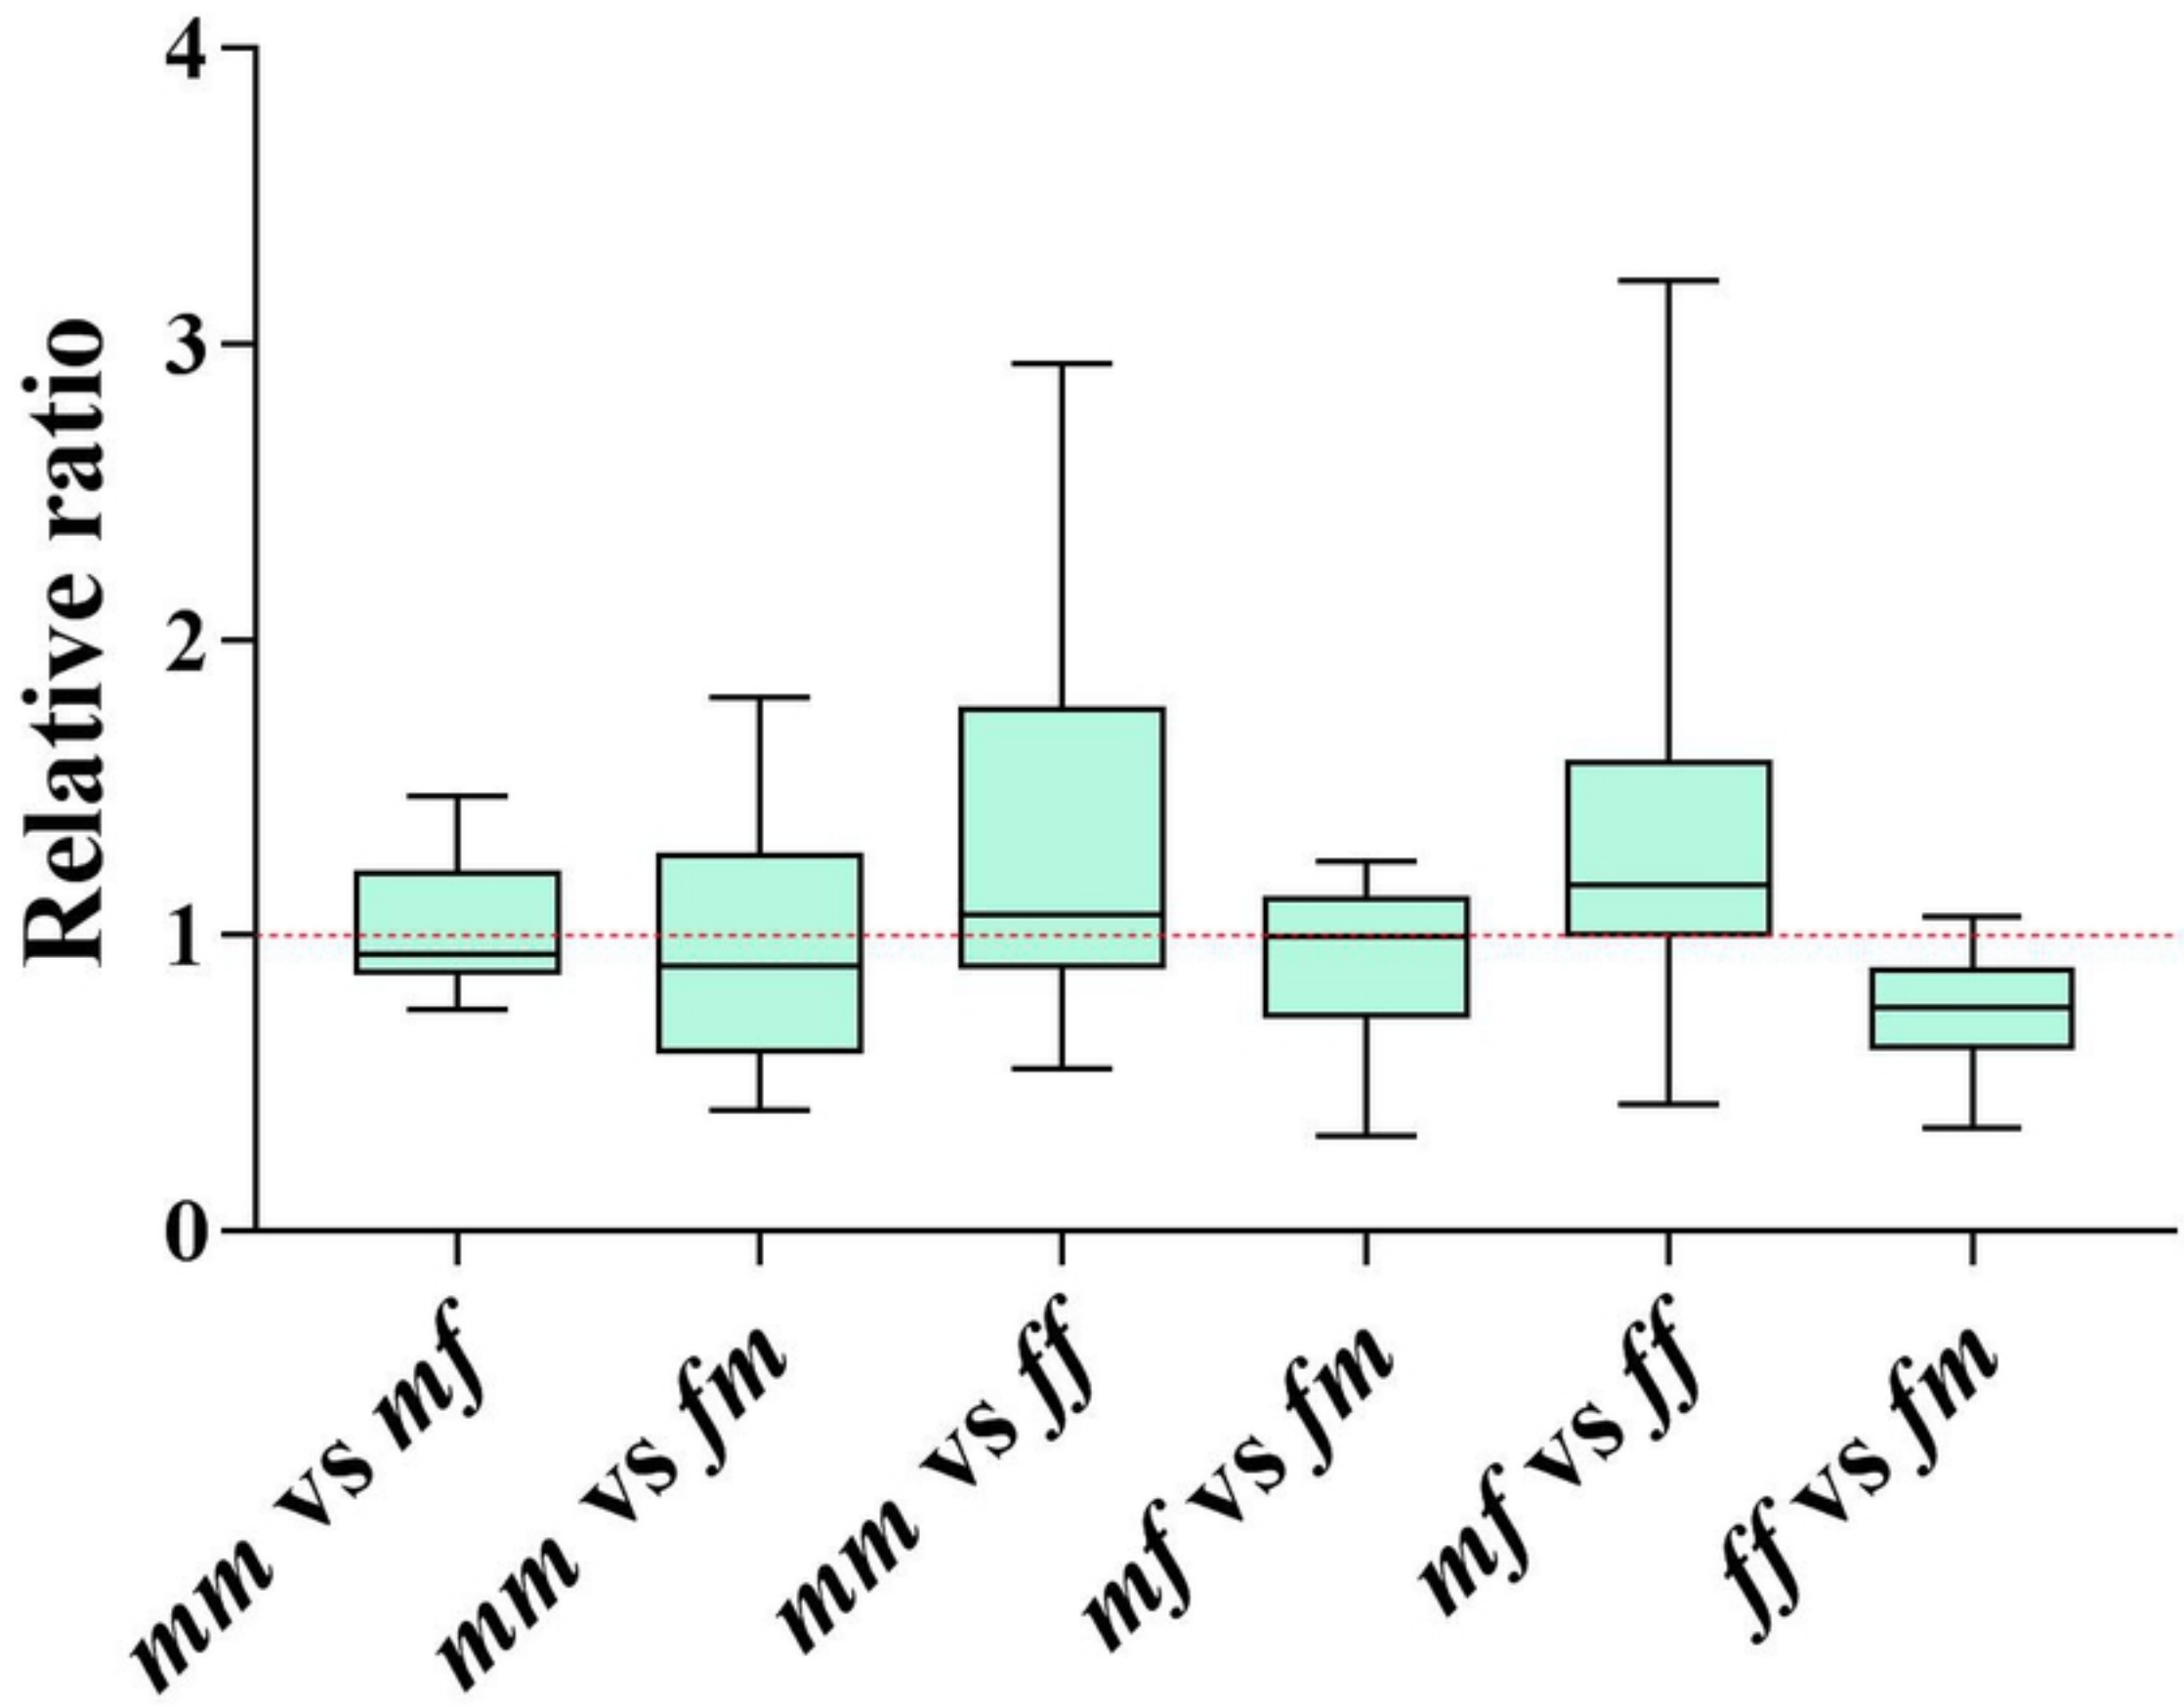

Figure 9
